# Supplementary material for: Prevalence of specific micronutrient deficiencies in urban school going children of India aged between 6 and 16 years: study protocol for a multicentric cross-sectional study
Source: PubMed Central journal article supplement — BMJ Open. 2021 Dec 14;11(12):e046783. doi: 10.1136/bmjopen-2020-046783 (PMC8671943; doi:10.1136/bmjopen-2020-046783), 2021-12-14
Supplement: bmjopen-2020-046783.draft_revisions.pdf [file bmjopen-2020-046783.draft_revisions.pdf]

# BMJ Open

BMJ Open is committed to open peer review. As part of this commitment we make the peer review history of every article we publish publicly available.

When an article is published we post the peer reviewers' comments and the authors' responses online. We also post the versions of the paper that were used during peer review. These are the versions that the peer review comments apply to.

The versions of the paper that follow are the versions that were submitted during the peer review process. They are not the versions of record or the final published versions. They should not be cited or distributed as the published version of this manuscript.

BMJ Open is an open access journal and the full, final, typeset and author-corrected version of record of the manuscript is available on our site with no access controls, subscription charges or pay-per-view fees (<http://bmjopen.bmj.com>).

If you have any questions on BMJ Open's open peer review process please email [info.bmjopen@bmj.com](mailto:info.bmjopen@bmj.com)

# BMJ Open

## Prevalence of specific micronutrient deficiencies in urban school going children of India aged between 6-16 years: study protocol for a multicentric cross-sectional study

|                               |                                                                                                                                                                                                                                                                                                                                                                                |
|-------------------------------|--------------------------------------------------------------------------------------------------------------------------------------------------------------------------------------------------------------------------------------------------------------------------------------------------------------------------------------------------------------------------------|
| Journal:                      | <i>BMJ Open</i>                                                                                                                                                                                                                                                                                                                                                                |
| Manuscript ID                 | bmjopen-2020-046783                                                                                                                                                                                                                                                                                                                                                            |
| Article Type:                 | Protocol                                                                                                                                                                                                                                                                                                                                                                       |
| Date Submitted by the Author: | 13-Nov-2020                                                                                                                                                                                                                                                                                                                                                                    |
| Complete List of Authors:     | Awasthi, Shally; King George Medical University, Pediatrics<br>Kumar, Divas; King George's Medical University, Pediatrics<br>Singh, Shweta; King George's Medical University, Psychiatry<br>Dixit, Swati; King George's Medical University, Pediatrics<br>Agarwal, Girdhar; University of Lucknow, Biostatistics<br>Mahdi, Abbas; King George Medical University, Biochemistry |
| Keywords:                     | NUTRITION & DIETETICS, Community child health < PAEDIATRICS, PUBLIC HEALTH                                                                                                                                                                                                                                                                                                     |
|                               |                                                                                                                                                                                                                                                                                                                                                                                |

SCHOLARONE™  
Manuscripts

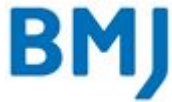

I, the Submitting Author has the right to grant and does grant on behalf of all authors of the Work (as defined in the below author licence), an exclusive licence and/or a non-exclusive licence for contributions from authors who are: i) UK Crown employees; ii) where BMJ has agreed a CC-BY licence shall apply, and/or iii) in accordance with the terms applicable for US Federal Government officers or employees acting as part of their official duties; on a worldwide, perpetual, irrevocable, royalty-free basis to BMJ Publishing Group Ltd ("BMJ") its licensees and where the relevant Journal is co-owned by BMJ to the co-owners of the Journal, to publish the Work in this journal and any other BMJ products and to exploit all rights, as set out in our [licence](#).

The Submitting Author accepts and understands that any supply made under these terms is made by BMJ to the Submitting Author unless you are acting as an employee on behalf of your employer or a postgraduate student of an affiliated institution which is paying any applicable article publishing charge ("APC") for Open Access articles. Where the Submitting Author wishes to make the Work available on an Open Access basis (and intends to pay the relevant APC), the terms of reuse of such Open Access shall be governed by a Creative Commons licence – details of these licences and which [Creative Commons](#) licence will apply to this Work are set out in our licence referred to above.

Other than as permitted in any relevant BMJ Author's Self Archiving Policies, I confirm this Work has not been accepted for publication elsewhere, is not being considered for publication elsewhere and does not duplicate material already published. I confirm all authors consent to publication of this Work and authorise the granting of this licence.

1 **Prevalence of specific micronutrient deficiencies in urban school going children of India**  
2 **aged between 6-16 years: study protocol for a multicentric cross-sectional study**  
3  
4

5 ShallyAwasthi<sup>1\*</sup>, Divas Kumar<sup>1</sup>, Shweta Singh<sup>2</sup>, Swati Dixit<sup>1</sup>, Girdhar Agarwal<sup>3</sup>, Abbas Ali  
6 Mahdi<sup>4</sup>.  
7  
8

9 Corresponding Author – Shally Awasthi, Department of Pediatrics, King George’s Medical  
10 University, Shahmina Road, Chowk, Lucknow, Uttar Pradesh, India. Email:  
11 shally07@gmail.com  
12  
13

14  
15  
16 <sup>1</sup>Department of Pediatrics, King George’s Medical University, Lucknow, Uttar Pradesh, India.  
17

18 <sup>2</sup>Department of Psychiatry, King George’s Medical University, Lucknow, Uttar Pradesh, India.  
19

20 <sup>3</sup>Department of Biostatistics, University of Lucknow, Lucknow, Uttar Pradesh, India.  
21  
22

23 <sup>4</sup>Department of Biochemistry, King George’s Medical University, Lucknow, Uttar Pradesh,  
24 India, Uttar Pradesh, India.  
25  
26

27 Word count (excluding title page, abstract, references, figures and tables) - 3765  
28  
29  
30  
31  
32  
33  
34  
35  
36  
37  
38  
39  
40  
41  
42  
43  
44  
45  
46  
47  
48  
49  
50  
51  
52  
53  
54  
55  
56  
57  
58  
59  
60

## ABSTRACT

### Introduction

Childhood and adolescence are the period of rapid physical and cognitive growth and development, requiring adequate nutrition. Malnutrition in the form of undernutrition or micronutrient deficiency or overweight/obesity effects the health, cognition and educational achievement of this age group. The objective this study is to assess the prevalence of Calcium, Iron, Ferritin, Zinc, Selenium, Folic acid, Vitamin A, 25 Hydroxy Vitamin D and Vitamin B12 deficiencies in the serum and Hemoglobin and Lead levels and its association with reported dietary intake and cognitive abilities, in urban school going children aged 6 to 16 years in ten cities of India.

### Methods and analysis

A multicentric cross sectional study will be conducted to recruit 2400 participants (240 per site). Participants will be selected using two stage random sampling technique and will be categorized into age groups of 6 to 11 years and 12 to 16 years, with equal distribution. Data on socio economic status, anthropometric measures and three-day dietary intake and cognitive performance will be collected. Blood samples will be collected for biochemical analysis of micronutrients. Findings will estimate the prevalence of micronutrient deficiencies and their association with dietary habits and cognitive functioning.

### Ethics and dissemination

Study protocol has been reviewed and approved by institutional ethics committee of all ten participating sites. Results will be shared and published in a peer-reviewed journal so that the findings will be helpful for the stakeholders in planning nutritional interventions for targeted groups.

**Trial registration number:** CTRI/2019/02/017783.

### Key words

Malnutrition, micronutrients, school age children, adolescents, cognitive, diet

## Strengths and limitations of this study

- Multicentric study with sites being representative of different geo-cultural regions of India.
- This protocol will clearly synthesize evidence on micronutrient deficiencies in school going children and adolescents.
- It will establish association between micronutrient status and cognitive performance of children.
- Chances of recall bias during self-reported dietary survey.

## INTRODUCTION

Childhood and adolescence are the period of rapid physical and cognitive growth and development, requiring adequate nutrition. Any change in nutritional status during this age influences health, learning and physical fitness. Nutrients essential for normal growth and functioning of human body are macronutrients like carbohydrate, fat and proteins, required in large quantities and micronutrients like vitamins and minerals required in small quantities. Vitamins, categorized as fat soluble (A, D, E and K) and water soluble (B group and C), are synthesized in human body in quantities lesser than required. Minerals are required for growth, repair and regulation of vital functions of human body. They are major minerals like calcium, phosphorus, sodium, potassium, magnesium and trace elements like iron, iodine, ferritin, fluoride, zinc, copper, cobalt, chromium, manganese, molybdenum, selenium and nickel.

The term malnutrition addresses three broad groups of conditions:

- Undernutrition: Indicating wasting (low weight-for-height), stunting (low height-for-age) and underweight (low weight-for-age)
- Micronutrient-related malnutrition: micronutrient deficiencies or excess
- Overweight and obesity

Micronutrient deficiencies affect an estimated two billion people, or almost one-third of the world's population (1). Various studies had reported the sub optimal nutritional status of Indian children. Prevalence of anaemia in school children and adolescents is between 19-88% across five different cities in India (2) and may be attributed to inadequate food intake, poor stores and deficiencies of nutrients (3). Nutrition anaemia is caused by deficiency of iron, folic acid and vitamin B 12 (4). The association between nutritional status and health, cognition and

1 educational achievement is established among the school going children (5). Deficiency of  
2 micronutrients and nutrients, delays cognitive and motor development and is associated with low  
3 Intelligence Quotient (IQ) (6,7,8). Stunting is linked to compromised intellectual attainment and  
4 school performance. Long term malnutrition may also result into thinness, decreased muscular  
5 strength and work capacity and reduced bone density later in life (9).  
6  
7  
8

9  
10 In Indian scenario, there is definitely a need for well-planned, large-scale study using  
11 standardized methodologies to estimate the prevalence of micronutrient deficiencies with giving  
12 due importance to accurate evaluation of socio-economic status and representation of the  
13 different regions of the country (10).  
14  
15

16 Hence the present study will be conducted with an aim to assess the prevalence of deficiency of  
17 various vitamins (Folic acid, Vitamin A, 25 Hydroxy Vitamin D, Vitamin B12) and minerals  
18 (Calcium, Iron, Zinc, Selenium) and its association with reported dietary intake and cognitive  
19 abilities, in urban school children aged 6 to 16 years in ten cities of India.  
20  
21  
22

## 23 **METHODOLOGY**

### 24 **Ethical approval**

25  
26 Ethical approval from institutional ethics committees of all the ten respective sites has been  
27 taken. The study is registered prospectively with Clinical Trial Registry of India (registration  
28 number CTRI/2019/02/017783).  
29  
30  
31

### 32 **Study design**

33  
34 This is a multi-centric cross-sectional study. It will be conducted in ten major cities across India.  
35 Each site will recruit 240 participants, having equal proportion of gender and age group (Figure  
36 1).  
37  
38  
39

### 40 **Study setting**

41  
42 Study sites at Bangalore, Bhubaneswar, Chandigarh, Dibrugarh, Jodhpur, Lucknow, Patna,  
43 Srinagar, Thiruvananthapuram and Udupi districts are selected as being representative of  
44 different geo-cultural regions of India (Figure 2). King George's Medical University (KGMU),  
45 Lucknow will be the central coordinating unit (CCU) for the study.  
46  
47  
48

49 These ten cities have a total population of 24.1 million, which is 2% of country's total  
50 population. Study cohort population in these cities was 7.1 million (11). Demographic  
51 characteristics and key anthropometric indicators in urban areas of study sites are shown in table  
52 1 (11,12).  
53  
54  
55  
56  
57  
58  
59  
60

Table 1: Demographic characteristics and key anthropometric indicators in urban areas of study sites

| Study Site                                              | Urban population of district (in millions) |               | Literacy rate (state) | Prevalence rate of (state) (age in years) |       |       |         |       |       |
|---------------------------------------------------------|--------------------------------------------|---------------|-----------------------|-------------------------------------------|-------|-------|---------|-------|-------|
|                                                         | All ages                                   | 6 to 16 years |                       | Severe thinness                           |       |       | Obesity |       |       |
|                                                         |                                            |               |                       | 5-9                                       | 10-14 | 15-19 | 5-9     | 10-14 | 15-19 |
| India                                                   | 377.11                                     | 76.73         | 84.1                  | 4.7                                       | 7.0   | 4.9   | 2.8     | 2.5   | 1.8   |
| M S Ramaiah Medical College & Hospital Bangalore        | 8.75                                       | 1.42          | 85.8                  | 5.2                                       | 3.4   | 4.0   | 2.4     | 1.5   | 8.0   |
| Kalinga Institute of Medical Sciences, Bhubaneswar      | 1.08                                       | 0.20          | 85.7                  | 1.5                                       | 2.5   | 0.4   | 8.9     | 9.1   | 4.5   |
| Post Graduate Institute of Medical Sciences, Chandigarh | 1.03                                       | 0.20          | 86.2                  | -                                         | -     | -     | -       | -     | -     |
| Assam Medical College, Dibrugarh                        | 0.24                                       | 0.043         | 88.5                  | 4.3                                       | 11.9  | 5.7   | 4.3     | 2.2   | 0.0   |
| All India Institute of Medical Sciences, Jodhpur        | 1.27                                       | 0.29          | 79.7                  | 4.3                                       | 7.4   | 5.4   | 1.3     | 1.5   | 1.7   |
| King George's Medical University, Lucknow               | 3.04                                       | 0.64          | 75.1                  | 5.9                                       | 6.6   | 3.3   | 2.0     | 1.0   | 0.0   |
| All India Institute of Medical Sciences, Patna          | 2.52                                       | 0.62          | 76.9                  | 5.5                                       | 7.6   | 3.2   | 0.8     | 0.2   | 0.2   |
| Sher-i-Kashmir Institute of Medical Sciences, Srinagar  | 1.22                                       | 0.24          | 77.1                  | 2.9                                       | 2.4   | 5.0   | 4.3     | 3.0   | 2.2   |
| Government Medical College,                             | 1.77                                       | 0.28          | 95.1                  | 2.9                                       | 4.1   | 6.4   | 5.4     | 1.8   | 0.8   |



|   |                    |          |      |      |      |     |     |     |     |     |
|---|--------------------|----------|------|------|------|-----|-----|-----|-----|-----|
| 1 | Thiruvananthapuram |          |      |      |      |     |     |     |     |     |
| 2 | Kasturba           | Medical  |      |      |      |     |     |     |     |     |
| 3 | College,           | Manipal, | 0.33 | 0.05 | 85.8 | 5.2 | 3.4 | 4.0 | 2.4 | 1.5 |
| 4 | Udupi              |          |      |      |      |     |     |     |     | 8.0 |
| 5 |                    |          |      |      |      |     |     |     |     |     |
| 6 |                    |          |      |      |      |     |     |     |     |     |
| 7 |                    |          |      |      |      |     |     |     |     |     |
| 8 |                    |          |      |      |      |     |     |     |     |     |
| 9 |                    |          |      |      |      |     |     |     |     |     |

## Objective

The primary objective of study is to assess the prevalence of Calcium, Iron, Zinc, Selenium, Folic acid, Vitamin A, 25 Hydroxy Vitamin D and Vitamin B12 deficiencies and blood Hemoglobin, Ferritin and Lead levels in urban school going children aged 6 to 16 years in ten cities of India.

Secondary objectives are:

- (a) To assess the association of Calcium, Iron, Zinc, Selenium, Folic acid, Vitamin A, 25 Hydroxy Vitamin D and Vitamin B12 deficiencies and blood Hemoglobin, Ferritin and Lead levels with anthropometric indicators in urban school going children aged 6 to 16 years in ten cities of India.
- (b) To assess the association of Calcium, Iron, Zinc, Selenium, Folic acid, Vitamin A, 25 Hydroxy Vitamin D and Vitamin B12 deficiencies and blood Hemoglobin, Ferritin and Lead levels with socioeconomic status in urban school going children aged 6 to 16 years in ten cities of India.
- (c) To assess the association of Calcium, Iron, Zinc, Selenium, Folic acid, Vitamin A, 25 Hydroxy Vitamin D and Vitamin B12 deficiencies and blood Hemoglobin, Ferritin and Lead levels with cognitive assessments in urban school going children aged 6 to 16 years in ten cities of India, by
  - General Intelligence (Colored Progressive Matrices (CPM), Standard Progressive Matrices (SPM))
  - Attention, concentration and Visuo-motor coordination (Coding Test)
  - Working Memory (Digit span Test, Arithmetic test)
- (d) To assess the association of Calcium, Iron, Zinc, Selenium, Folic acid, Vitamin A, 25 Hydroxy Vitamin D and Vitamin B12 deficiencies and blood Hemoglobin, Ferritin and Lead levels with three-day dietary intake assessed by 24 hours recall method in urban school going children aged 6 to 16 years in ten cities of India.

## Sample size computation

1 Assuming the prevalence of folate deficiency in India as 30.7% (13), precision of 2% and level  
2 of confidence 0.05, the calculated sample size is 2044 participants. After taking, attrition rate of  
3 10% sample size will inflate to 2400 participants. This sample size will be equally divided in ten  
4 sites respectively.  
5  
6

### 7 **Sampling technique**

8 Participants will be selected by using two-stage sampling technique. In the first stage, schools  
9 will be selected, and in the second stage participants will be recruited from the selected schools.  
10  
11

### 12 **Selection of participants**

13 Each study site will provide a list of schools imparting co-education to children between 6 to 16  
14 years of age and located within the urban limits of city. From this list six schools will be  
15 randomly selected, having at least one to a maximum of three private schools. Principals of  
16 recruited schools will be met to obtain written voluntarily informed consent. They will be asked  
17 to allocate a coordinating teacher from the school. With the help of coordinating teacher, a  
18 gender-wise list of students between 6 to 11 and 12 to 16 years of age will be prepared. From  
19 each of these lists, fifteen students who are apparently healthy and residing within five  
20 kilometers of radius from school will be randomly selected. They will be invited to participate  
21 into the study. Out of these, first ten participants whose parents will provide written informed  
22 consent will be included into the study. Rest will be kept as back-up in case of exclusions.  
23 Participants having body mass index (BMI) below 12.5% will be excluded from the study.  
24 Written assent will be obtained from all participants who will be 8 years or above of age.  
25  
26  
27  
28  
29  
30  
31  
32  
33  
34  
35  
36

### 37 **Training of study team**

38 Site team will consist of a social worker, a data entry operator, a Nutritionist and a Psychologist.  
39 Training of Nutritionist and Psychologist will be conducted at CCU Lucknow by project  
40 investigators and co-investigators. These will be oriented to train the site staff on study protocol,  
41 procedures, data collection instruments, data entry tools and standard operating procedures.  
42  
43  
44  
45  
46

### 47 **Data collection**

48 The study opened for data collection in April 2019 and is still ongoing due to COVID-19  
49 pandemic and is expected to complete by mid of 2021.  
50  
51

52 Demographic and socioeconomic data  
53  
54  
55  
56  
57  
58  
59  
60

Demographic and socioeconomic details of participant will be recorded by interviewing participants and their primary care giver. Revised Kuppuswamy's socioeconomic scale (14) will be used to assess socioeconomic status.

#### Anthropometric measurements

The height will be measured to the nearest 0.1 centimeter using Seca 213 Mobile Stadiometer (Seca, Hamburg, Deutschland). Participant will be asked to stand barefoot after removing hair barrettes & rubber bands, with the heels, back, and head touching the measuring rod. A head board placed above the head perpendicular to the ruler on measuring rod and parallel to the ground will be used to record height measure. Two measurements of height will be taken for each participant. If the difference between the two height measurements is greater than 5 mm, then a second set of two height measurements will be taken to obtain more precise values.

Weight will be measured to the nearest 0.1 kilogram using portable Seca 803 weighing scale (Seca, Hamburg, Deutschland). The unit will be standardized by calibrating it to zero before each measurement. The participants will be weighed barefoot with empty pockets and without any heavy items like woolen blazers or belts.

Body Mass Index (BMI) will be calculated using the standard equation:

$$\text{BMI} \left( \frac{\text{kg}}{\text{m}^2} \right) = \text{Weight (in kg)} / [\text{Height (in m)}]^2$$

For assessing anthropometric indicators, recommendations of the WHO expert committee will be used as shown in table 2.

Table 2: Recommendations of the WHO expert committee for assessing anthropometric indicators

|                 |                                                                   |
|-----------------|-------------------------------------------------------------------|
| Stunting        | : Height for age < -2 SD of the WHO Child Growth Standards median |
| Severe thinness | : BMI for age < -3 SD of the WHO Child Growth Standards median    |
| Thinness        | : BMI for age < -2 SD of the WHO Child Growth Standards median    |
| Overweight      | : BMI for age > +1 SD of the WHO Child Growth Standards median    |
| Obesity         | : BMI for age > +2 SD of the WHO Child Growth Standards median    |
| Severe obesity  | : BMI for age > +3 SD of the WHO Child Growth Standards median    |

#### Cognitive assessment

Cognitive assessment will be administered at a mutually convenient time in a separate room to keep relaxed and pleasant environment. The assessment will be conducted in a single individual session. During the assessment session, the psychologist will first make the child comfortable by establishing good rapport. Each participant will be assessed for attention, concentration and

visuo-motor coordination through coding test (15), general intelligence through colored progressive matrices (CPM)(16)/ standard progressive matrices (SPM)(17) and working memory using arithmetic and digit span test (15).

*Coding test:* Sheet 'A' will be used for participants below 8 years of age, rest will use sheet 'B' sheet. Participants will be given 120 seconds to complete the test. One point will be awarded for each correct response, excluding samples.

*CPM/SPM:* CPM will be administered to participants 6 to 11 years of age. Participants 12 years or above of age will be given SPM. Each participant will be given about 15 to 20 minutes to complete the assessment.

*Arithmetic and digit span test:* These will be undertaken by all the participants. 3 to 5 minutes will be given to complete digit span test and 10 minutes will be given for arithmetic test.

For scoring and interpretation of test results, standard tables from respective test's manual (15,16,17) will be referred.

#### Dietary assessment

General dietary assessment will include dietary habits, meal frequency and consumption of water, beverages, green leafy vegetables, fruits, and animal products. Frequencies of common food items, popular among children will also be captured.

Data on dietary intake of children will be collected using 24h recall method for two non-consecutive days and one Sunday, which are not fasting or feasting days. The intake will be recorded by interviewing participant along with his/her mother or primary caregiver. Previously standardized cups, glass and spoons will be used as an aid to help in recalling the quantity of different foods consumed by the participants in a 24 hour period prior to the investigation.

For calculating the nutritive value of raw ingredients, Nutritive value of Indian foods will be used (18). Daily nutrient intake for all the nutrients will be calculated using DIETSOFT Software and will be compared with the Recommended Dietary Allowances (19).

Dietary intake will be assessed in terms of Nutrient Adequacy Ratio (NAR)(20). The NAR for a given nutrient is the ratio of a participant's intake to the current recommended allowance for each sex and age category. To estimate the nutrient adequacy of the diet, NAR will be calculated for all the nutrients using the equation:

$$\text{NAR} = \text{Participant's nutrient intake of a day} / \text{RDA of the respective nutrient}$$

Participants will be then categorized as having (a) Adequate NAR ( $\text{NAR} \geq 1.00$ ), (b) Fairly adequate NAR ( $0.66 > \text{NAR} < 1.00$ ) and Inadequate NAR ( $\text{NAR} < 0.66$ ), for various nutrients (20).

1 Dietary diversity (DD), defined as the number of different foods or food groups consumed in a  
2 day, will be measured using Dietary Diversity Score (DDS). DDS will be measured by  
3 categorizing the food items, consumed in a day, into fourteen groups. Simple counting of  
4 different types of food groups consumed in a particular day will give individual DDS, which  
5 would range from 1 to 14.  
6  
7  
8

9  
10 Thereafter, participants will be categorized in three classes according to their Dietary Diversity  
11 Score (21)-  
12

- 13 1. Low:  $\leq 8$
  - 14 2. Moderate: 9
  - 15 3. High:  $\geq 10$
- 16  
17  
18  
19

20 The fourteen food groups that we would use are animal meat, cereals and millets, fats and edible  
21 oils, meat and poultry, fishes and other sea foods, fruits, pulses and legumes, green leafy  
22 vegetables, milk and milk products, nuts and oil seeds, other vegetables, roots and tubers, sugars  
23 and miscellaneous foods.  
24  
25  
26

27  
28 Blood sample collection, processing and storage

29 Blood sampling will be done at school in presence of parent/s where available, by trained  
30 phlebotomists. Venous blood sample of 6 ml (4 ml in clot activator and 2 ml in EDTA) will be  
31 collected using vacuum-tube systems, preferably from cubital vein. Measures to prevent and  
32 counter any adverse event like syncope, hematoma or swelling will be adequately employed and  
33 recorded.  
34  
35  
36  
37

38 Blood sample transportation from school to study sites will be done maintaining temperature of  
39  $2^{\circ}\text{C}$  to  $8^{\circ}\text{C}$ . One ml of EDTA sample will be sent to a centralized laboratory (National  
40 Accreditation Board for Testing and Calibration Laboratories (NABL) and The College of  
41 American Pathologists (CAP) accredited) for complete blood count (CBC) assessment. The CBC  
42 assessment will include estimation of hemoglobin, hematocrit, red blood cell count, mean  
43 corpuscular volume, mean corpuscular hemoglobin, mean corpuscular hemoglobin  
44 concentration, RDW-CV, platelet count, total leucocyte count, differential leucocyte count and  
45 absolute leucocyte count. Report of CBC assessment will be given to parents with relevant  
46 advice by site investigators. Rest of the samples will be processed at site to separate plasma,  
47 serum and packed cells. Plasma and serum will be stored below  $-20^{\circ}\text{C}$  and packed cells between  
48  $2^{\circ}\text{C}$  to  $8^{\circ}\text{C}$ , at the study sites, with restricted access. Samples from study sites to CCU will be  
49 transported in two batches of 120 each, maintaining required temperatures. Sample  
50  
51  
52  
53  
54  
55  
56  
57  
58  
59

transportation will be managed by professional agencies having expertise in handling and shipment of bio-medical samples.

#### Biochemical assessment

Biochemical analysis of blood samples will be carried out at Department of Biochemistry, KGMU. Levels of serum calcium, iron, ferritin, folic acid, Vitamin B-12, Vitamin D, Vitamin A, zinc, plasma selenium and lead in whole blood will be assessed.

Inductively coupled plasma-optical emission spectrometry (ICP-OES) will be used to assess zinc, selenium and lead. Stock solutions for respective elements will be prepared at a concentration of 1000 mg/L. Working standard will be prepared by diluting stock solution in 2% nitric acid in desired range. Adding 0.5 ml of sample, 1.5 ml nitric acid, 0.5 ml of perchloric acid, 1.0 ml of hydrogen peroxide and 1.0 ml of Mili-Q water will do microwave digestion. A Multiwave Reaction System equipped with the Rotor 16HF100 (100 ml PFA vessels, 40 bar) and Pressure, Temperature (p/T) sensor, will be used for digestion. Clear solution obtained after microwave digestion will be analyzed by ICP-OES (Optima 8000, Perkin Elmer) maintaining operational conditions as shown in table 3.

Table 3: Operational conditions for Inductively coupled plasma-optical emission spectrometry

|                    |   |            |
|--------------------|---|------------|
| Plasma Gas Flow    | : | 8 L/min    |
| Auxiliary Gas Flow | : | 0.2 L/min  |
| Carrier Gas Flow   | : | 0.55 L/min |
| RF Power           | : | 1300 W     |
| View Distance      | : | 15 nm      |
| Plasma view        | : | Axial      |
| Sample flow rate   | : | 1.0 ml/min |

The value of metal (zinc, selenium, lead) will be calculated using the formula:

$$\text{Metal} \left( \mu_{\text{dl}}^{\text{g}} \right) = (\text{Sample reading} - \text{Blank reading}) \times \text{dilution made} \times 100 / \text{Sample taken (ml)}$$

Folic acid, Vitamin B 12, Vitamin D and ferritin levels will be determined using Chemiluminescence method using a fully automatic analyzer. Folic acid estimation will be done by using ARCHITECT Folate Reagent Kit (Abbot Diagnostics, Iceland), 1P74-27. The Immulite folic acid is a competitive analog immunoassay with incubation cycles of  $2 \times 30$  minutes. For Vitamin B 12 assessment, ARCHITECT B12 Reagent Kit (Abbot Diagnostics, Iceland), 7K61-27 will be used. Immulite 1000 vitamin B12 is a solid-phase, two-site chemiluminescent

1 immunometric assay with incubation cycles of  $1 \times 60$  minutes. These estimations depend on  
2 chemiluminescence reactions in which part of the chemical energy generated produces excited  
3 intermediates that decay to a ground state with the emission of photons. The emitted radiation is  
4 measured using a photomultiplier tube and the signal is converted into analyte concentration.  
5  
6

7  
8 The ARTICHECT 25-OH vitamin D Assay (5P02, G5-6832/R03, Abbot Diagnostics, Iceland)  
9 uses chemiluminescent immunoassay technology. Specific antibody to vitamin D is used for  
10 coating magnetic particles (solid phase) and vitamin D is linked to an isoluminol derivative.  
11 During the incubation, 25-hydroxyvitamin D is dissociated from its binding protein and  
12 competes with labelled vitamin D for binding sites on the antibody. After the incubation, the  
13 unbound material is removed with a wash cycle. Subsequently, the starter reagents are added and  
14 a flash chemiluminescent reaction is initiated. The light signal is measured by a photomultiplier  
15 as relative light units and is inversely proportional to the concentration of 25-hydroxyvitamin D  
16 present in samples. Quantitative determination of ferritin in serum will be done using  
17 ARTICHECT Ferritin 7k59 kit, B7K590 (Abbot Diagnostics, Iceland).  
18  
19  
20  
21  
22  
23  
24  
25

26 Vitamin A in serum will be analyzed by immune-enzymatic assay (ELISA), using commercially  
27 available kit (CED051Ge, USCN Wuhan USCN Business Co., Ltd.) This assay employs the  
28 competitive inhibition enzyme immunoassay technique. A monoclonal antibody specific to  
29 retinol has been pre-coated onto a microplate. A competitive inhibition reaction is launched  
30 between biotin labeled retinol and unlabeled retinol (Standards or samples) with the pre-coated  
31 antibody specific to retinol. After incubation the unbound conjugate is washed off. Next, avidin  
32 conjugated to Horseradish Peroxidase (HRP) is added to each microplate well and incubated.  
33 The amount of bound HRP conjugate is reverse proportional to the concentration of retinol in  
34 the sample. After addition of the substrate solution, the intensity of color developed is reverse  
35 proportional to the concentration of retinol in the sample.  
36  
37  
38  
39  
40  
41  
42  
43

44 Serum calcium will be measured by Fully Automatic Biochemistry Analyzer by Selectra PRO  
45 M, using Calcium Arsenazo III Colorimetric 30160, Labkit. Calcium with Arsenazo III (1, 8-  
46 Dihydroxy-3, 6-disulpho-2, 7-naphthalene-bis (azo)-dibenzene arsonic acid), at neutral pH, yields  
47 a blue colored complex. The intensity of the color formed is proportional to the calcium  
48 concentration in the sample.  
49  
50  
51  
52

53 Serum iron levels will be assessed using ELITech Clinical Systems Selectra Pro Series  
54 Analyzers (Iron ferene, FEFE-0203 *ELITech Group* empowering IVD, USA). Iron released from  
55 transferrin in acidic pH as ferric ion ( $\text{Fe}^{3+}$ ), is reduced by the ascorbic acid into ferrous ion ( $\text{Fe}^{2+}$ )  
56  
57  
58  
59  
60

1 which eventually forms a colored complex with ferene. The 578 nm absorbance of the iron-ferene  
2 complex is proportional to their concentration in the sample.  
3

#### 4 **Patient and public involvement**

5 Patients and/or the public are not involved in the design, or conduct, or reporting, or  
6 dissemination plans of this research.  
7

#### 8 **Quality assurance**

9 Robust mechanisms will be employed to maintain the quality of data collection. Data collection  
10 at sites will be done under direct supervision of Site Investigator / Co-Investigator. CCU will  
11 also monitor data quality by onsite monitoring to observe data collection process and ascertain  
12 work in accordance to laid SOPs. Scoring sheets for cognitive assessments will also be assessed  
13 for scoring and interpretation of results at CCU. Dietary records will be assessed for  
14 appropriateness of proportion of ingredients and entry in DIETSOFT software. Retraining will  
15 be imparted where lacunae will be identified. Controls will run daily, before biochemical  
16 analysis of blood samples.  
17

#### 18 **Data management and statistical analysis**

19 Data will be entered in MS excel (Double data entry), matched electronically and discrepancies  
20 will be rectified by referring the source documents. Point estimates and confidence intervals of  
21 proportions of different micronutrient deficiencies shall be evaluated. These estimates shall be  
22 found for overall proportion as well as city-wise proportion. Different measures of association  
23 (Kendall, Somer, Goodman and Kruskal etc.) shall be found for categorical data (micronutrient  
24 deficiency with cognitive function, socio economic status, dietary intake). Pearson's correlation  
25 coefficient shall be computed for measuring association for continuous variables etc.).  
26

#### 27 **DISCUSSION**

28 Micronutrient deficiencies are a major problem in developing countries and India is not an  
29 exception. It adversely affects the population health resulting in decreased national performance  
30 and productivity, adding financial burden to the country. Despite the steps taken by government  
31 through various food supplementation and food fortification programs, problem is still deep  
32 rooted. Large population of children and adolescents is still bearing the curse of micronutrient  
33 deficiencies (12,22-27). Several researchers have investigated the magnitude of problem in India  
34 at various time points. These studies were mostly isolated and were confined to anaemia, ferritin,  
35 folate, vitamin B12 and vitamin D. In the recent times, much interest has been generated in  
36 multiple micronutrient deficiencies, little is known about the magnitude and significance of this  
37  
38  
39  
40  
41  
42  
43  
44  
45  
46  
47  
48  
49  
50  
51  
52  
53  
54  
55  
56  
57  
58  
59  
60



1 problem. The evidence on interactions between micronutrients, however, clearly indicates a need  
2 for more work in this area (28). The present study, perhaps first of its kind, will provide the  
3 estimates of Calcium, Iron, Zinc, Selenium, Folic acid, Vitamin A, 25 Hydroxy Vitamin D and  
4 Vitamin B12 deficiencies and blood Hemoglobin, Ferritin and Lead levels its association with  
5 anthropometric indicators, socioeconomic status, cognitive abilities and dietary habits along with  
6 three-day dietary intake, at country level.  
7  
8  
9  
10

11 The dietary intake assessment of population provides important information on the frequency  
12 and distribution of diets and nutritional status. This information can be used in designing  
13 interventions targeting improvement in dietary habits at community level. A wide variety of  
14 methods are available for dietary assessment, each one having its own advantages and  
15 disadvantages. The 24-hour dietary recall method is the most widely used method. This is a  
16 subjective and retrospective method that requires face to face or telephonic interview and  
17 consists of precisely recalling, describing and quantifying the intake of foods and beverages  
18 consumed  
19  
20  
21  
22  
23  
24

25 in the 24-hour period prior to, or during the day before the interview. Although the most  
26 thorough, comprehensive and complete instrument for dietary assessment, 24-hour dietary recall  
27 method has extensive dependence on interviewer's skills and participant's memory (29). In  
28 current study, since we will be assessing the actual level of micronutrients through biochemical  
29 analysis, at the same time we can correlate the results to that of 24-hour dietary recall.  
30  
31  
32  
33

34 Cognitive development is a continuous and sequential process from birth through adulthood.  
35 Cognition compasses memory, association, concept formation, pattern recognition, language,  
36 attention, perception, action, problem solving and mental imagery as a process (30,31). These  
37 processes are mandatory and interrelated for any task acquisition. Intelligence varies from person  
38 to person because of differences in their environmental and biological components. Biological  
39 factors like genes, maternal age and environmental factors like socioeconomic status,  
40 malnutrition, etc. influence intelligence adversely. Deficiency of micronutrients is associated  
41 with impaired neuropsychological development and classroom performance (32,33).  
42 Malnutrition during the early part of life (1–5 years) delays physical growth, motor and cognitive  
43 development (34-36). Studies have shown that skipping breakfast interferes with cognitive  
44 performance of students.  
45  
46  
47  
48  
49  
50  
51  
52

53 While there are several identified micronutrients, the role of only Iron, Zinc, Iodine, and vitamins  
54 is studied well in India. The researches clearly indicate that the school age period is nutritionally  
55 significant because this is the prime time to build up body stores of nutrients in preparation for  
56 rapid growth of adolescence.  
57  
58  
59  
60

Hence, the findings of present study may add to the existing body of knowledge not only to the prevalence but also the association of micronutrient deficiencies with cognitive abilities, dietary patterns anthropometric indicators, socioeconomic status. These finding may be further scaled up to interventions to provide adequate nutrition to targeted groups, so as to promote health and cognitive abilities thus resulting in increased productivity.

**Acknowledgement:** Indian Micronutrient Consortium (in alphabetical order): Abbas Ali Mahdi, King George's Medical University, Lucknow; Anish TS, Government Medical College, Thiruvananthapuram; B N Mahanta, Assam Medical College, Dibrugarh; Bhavneet Bharti, Post Graduate Institute of Medical Sciences, Chandigarh; C M Singh, All India Institute of Medical Sciences, Patna; Chythra R Rao, Kasturba Medical College, Manipal; Daisy Kheda, All India Institute of Medical Sciences, Jodhpur; Divas Kumar, King George's Medical University, Lucknow; Girdhar Agarwal, University of Lucknow, Lucknow; Joseph L Mathew, Post Graduate Institute of Medical Sciences, Chandigarh; Karunakara BP, M. S. Ramaiah Institute of Medical Sciences, Bangalore; Kuldeep Singh, All India Institute of Medical Sciences, Jodhpur; Mushtaq A Bhat, Sher-i-Kashmir Institute of Medical Sciences, Srinagar; Shally Awasthi, King George's Medical University, Lucknow; Shweta Singh, King George's Medical University, Lucknow; Somashekar AR, M. S. Ramaiah Institute of Medical Sciences, Bangalore; Sonali Kar, Kalinga Institute of Medical Sciences, Bhubaneswar; Suma Nair, Kasturba Medical College, Manipal; Swati Dixit, King George's Medical University, Lucknow, Tulika Goswami Mahanta, Assam Medical College, Dibrugarh.

### **Competing interests**

The authors declare that they have no competing interests.

### **Source of funding**

This work is supported by a grant from Hindustan Unilever Limited (Grant Number: 212332). Funding supports all study related expenses including manuscripts processing fees. Funding source is not involved in study design, implementation, collection and interpretation of data and in writing of the manuscript.

### **Author Contributions**

SA conceived the study and is principal investigator, responsible for finalizing study protocol and manuscript. DK contributed to design of the final study protocol, drafted the initial manuscript and coordinated ethical approvals. SS, SD and AAM contributed to the technical design of final study protocol and revised the initial manuscript draft. GA provided biostatistical support. IMC are site investigators and contributed in the design of the final study protocol.

### **Patient consent for publication**

For peer review only - <http://bmjopen.bmj.com/site/about/guidelines.xhtml>

1 Not required.

## 2 **Ethics and dissemination**

3  
4 Ethics approval for this study was obtained from the respective institutional ethics committee of  
5 all participating sites. Written informed consent will be obtained from parents of all study  
6 participants. Findings will be disseminated with stakeholders and will be presented in national  
7 and international conferences. Results will be published in a peer-reviewed journal.  
8  
9

## 10 **Data statement**

11  
12 Results from this protocol will be published in a peer reviewed journal. Alternatively, data can  
13 be provided on request to corresponding author.  
14  
15

## 16 **REFERENCES:**

- 17  
18  
19  
20  
21 1. Thompson B & Amoroso L (editors) (2014) Improving Diets and Nutrition: Food-Based  
22 Approaches. Rome and Wallingford: FAO and CAB International.
- 23  
24 2. Srihari G, Eilander A, Muthayya S, Kurpad A V., Seshadri S. Nutritional status of  
25 affluent indian school children: What and how much do we know? Indian Pediatr.  
26 2007;44(3):204–13.
- 27  
28 3. Gomber S, Bhawna, Madan N, Lal A, Kela K. Prevalence & etiology of nutritional  
29 anaemia among school children of urban slums. Indian J Med Res 118, October 2003, pp  
30 167-171
- 31  
32 4. Gonmei Z, Toteja GS. Micronutrient status of Indian population. Indian J Med Res. 2018  
33 Nov; 148(5): 511–521. doi: 10.4103/ijmr.IJMR\_1768\_18
- 34  
35 5. Best C, Neufingerl N, Van Geel L, Van Den Briel T, Osendarp S. The nutritional status  
36 of school-aged children: Why should we care? Food Nutr Bull. 2010;31(3):400–17.
- 37  
38 6. Black, M. M. (2003). The evidence linking zinc deficiency with children’s cognitive and  
39 motor functioning. Journal of Nutrition, 133, 1473S–1476S.
- 40  
41 7. Gowri, A.R. and Sangunam, H.J. (2005) ‘Assessment of mental and motor abilities of  
42 school going children with anaemia’, *Indian Journal of Nutrition and Dietetics*, Vol. 42,  
43 pp.99–105.
- 44  
45 8. Schoenthaler, S. J., Bier, I. D., Young, K., Nichols, D. & Janssens, S. (2000). The effect  
46 of vitamin-mineral supplementation on the intelligence of American schoolchildren: a  
47 randomized, double-blind placebo-controlled trial. J Altern Complement Med 6(1): 19-  
48 29.  
49  
50  
51  
52  
53  
54  
55  
56  
57  
58  
59  
60

- 1 9. WHO. Physical status: The use and interpretation of anthropometry. World Health  
2 Organization - Technical Report Series. 1995. p. 1–454.  
3
- 4 10. G. Srihari, A. Eilander, S. Muthayya, A.V. Kurpad and S. Seshadri; Nutritional Status of  
5 Affluent Indian School Children: What and How Much Do We Know? Indian Pediatrics  
6 2007; 44:199-203  
7
- 8 11. Chandramouli C, General R. Census of India 2011. Provisional Population Totals. New  
9 Delhi: Government of India. 2011. Available at: [http://censusindia.gov.in/2011-prov-](http://censusindia.gov.in/2011-prov-results/prov_results_paper1_india.html)  
10 results/prov\_results\_paper1\_india.html.  
11
- 12 12. Ministry of Health and Family Welfare (MoHFW), Government of India, UNICEF and  
13 Population Council. 2019. Comprehensive National Nutrition Survey (CNNS) National  
14 Report. New  
15 Delhi. <https://nhm.gov.in/index1.php?lang=1&level=2&sublinkid=1332&lid=713>  
16
- 17 13. Umesh Kapil and Neha Sareen. Prevalence of Ferritin, Folate and Vitamin B12  
18 Deficiencies Amongst Children in 5–18 years of Age in Delhi. Indian J Pediatr  
19 2014;81(3):312.  
20
- 21 14. Sharma Rahul. Revised Kuppuswamy's Socioeconomic Status Scale: Explained and  
22 Updated. Indian Pediatr 2017;54:867-870.  
23
- 24 15. Malin, A. J. (1969). Manual for Malin's intelligence Scale for Indian Children (MISIC).  
25 Lucknow: Indian Psychological Corporation.  
26
- 27 16. Raven, J., Raven, J. C., & Court, H. (1998). Coloured Progressive Matrices. 1998  
28 Edition. USA: Harcourt Assesment.  
29
- 30 17. Raven, J., Raven, J. C., & Court, H. H. (2000). Raven manual: Section 3. Standard  
31 Progressive Matrices. Oxford: Oxford Psychologists Press, Ltd.  
32
- 33 18. Gopalan C, Rama Sastri B V, Balasubramanian SC, Narasinga Rao BS. Nutritive value of  
34 Indian foods. Hyderabad: National Inst. of Nutrition; 2007.  
35
- 36 19. Kamala K, Bhaskaram P, Bhat RV RT. DIETARY GUIDELINES - A Manual. Natl Inst  
37 Nutr [Internet]. 2011;3(1):139. Available from:  
38 <http://ninindia.org/DietaryGuidelinesforNINwebsite.pdf>  
39
- 40 20. Rani N, Rani V. Assessment of Nutritional Status of School Going Adolescents in  
41 Fatehabad District of Haryana Research Article. Indian J Nutr. 2016;3(2):1–5.  
42
- 43 21. Nithya DJ, Bhavani R V. Dietary diversity and its relationship with nutritional status  
44 among adolescents and adults in rural India. J Biosoc Sci. 2018;50(3):397–413.  
45  
46  
47  
48  
49  
50  
51  
52  
53  
54  
55  
56  
57  
58  
59  
60

- 1 22. Tahmeed Ahmed, Muttaquina Hossain, KaziIstiaque Sanin; *Ann NutrMetab*  
2 2012;61(suppl 1):8–17; Jan 2013, DOI: 10.1159/000345165
- 3
- 4 23. Kotecha, P.V., Lahariya, C. Micronutrient supplementation and child survival in  
5 India. *Indian J Pediatr* 77, 419–424 (2010). <https://doi.org/10.1007/s12098-010-0050-0>
- 6
- 7 24. Kapil U, Bhadoria AS. Prevalence of folate, ferritin and cobalamin deficiencies amongst  
8 adolescent in India. *J Family Med Prim Care*. 2014;3:247–9.
- 9
- 10
- 11 25. Bhardwaj A, Kumar D, Raina SK, Bansal P, Bhushan S, Chander V, et al. Rapid  
12 assessment for coexistence of Vitamin B12 and iron deficiency anemia among adolescent  
13 males and females in Northern Himalayan state of India. *Anemia*. 2013;2013:959605.
- 14
- 15 26. Verma S. Incidence of Vitamin B12 and folate deficiency amongst adolescents. *Int J*  
16 *ContempMedRes*. 2017;4:1755–7.
- 17
- 18 27. Gupta A, Kapil U, Ramakrishnan L, Pandey RM, Yadav CP. Prevalence of Vitamin B12  
19 and folate deficiency in school children residing at high altitude regions in India. *Indian J*  
20 *Pediatr*. 2017;84:289–93.
- 21
- 22 28. Usha Ramakrishnan; Prevalence of Micronutrient Malnutrition Worldwide; May 2002:  
23 (II)S46–S52; Downloaded from [https://academic.oup.com/nutritionreviews/article-](https://academic.oup.com/nutritionreviews/article-abstract/60/suppl_5/S46/1896146)  
24 [abstract/60/suppl\\_5/S46/1896146](https://academic.oup.com/nutritionreviews/article-abstract/60/suppl_5/S46/1896146)
- 25
- 26 29. Salvador Castell G, Serra-Majem L, Ribas-Barba L. What and how much do we eat? 24-  
27 hour dietary recall method. *Nutr Hosp*. 2015;31 Suppl 3:46-48. Published 2015 Feb 26.  
28 doi:10.3305/nh.2015.31.sup3.8750
- 29
- 30 30. Best, J. B. (1999). *Cognitive Psychology* (5th ed.). pp. 15–17.
- 31
- 32 31. Coren, S., Lawrence, M. W., & James, T. E. (1999). *Sensation and Perception* (5th  
33 ed.). Harcourt Brace. ISBN 978-0-470-00226-1. p. 9
- 34
- 35 32. Dubow, E. F., Boxer, P. & Huesmann, L. R. (2009). Long-term effects of parents'  
36 education on children's educational and occupational success: Mediation by family  
37 interactions, child aggression, and teenage aspirations. *Merrill Palmer Q* (Wayne State  
38 Univ Press) 55:224–49.
- 39
- 40 33. Maurin, E. (2002). The impact of parental income on early schooling transitions: A re-  
41 examination using data over three generations. *J Public Econ*. 85:301–32.
- 42
- 43 34. Der, G., Batty, G. D. & Deary, I. J. (2006). Effect of breast feeding on intelligence in  
44 children: Prospective study, sibling pairs analysis, and meta-analysis. *BMJ*. 333:945.
- 45
- 46 35. Warsito, O., Khomsan, A., Hernawati, N. & Anwar, F. (2012). Relationship between  
47 nutritional status, psychosocial stimulation, and cognitive development in preschool  
48 children in Indonesia. *Nutr Res Pract*. 6:451–7.
- 49
- 50
- 51
- 52
- 53
- 54
- 55
- 56
- 57
- 58
- 59

1 36. More, S., Shivkumar, V. B., Gangane, N. & Shende, S. (2013). Effects of iron deficiency  
2 on cognitive function in school going adolescent females in rural area of central  
3 India. Anemia. 819136.  
4  
5  
6

7 **List of figures:**  
8

9  
10 Figure 1: Distribution of participants based on gender and age group across ten study sites.  
11

12 Figure 2: Study sites and their geo-coordinates  
13  
14  
15  
16  
17  
18  
19  
20  
21  
22  
23  
24  
25  
26  
27  
28  
29  
30  
31  
32  
33  
34  
35  
36  
37  
38  
39  
40  
41  
42  
43  
44  
45  
46  
47  
48  
49  
50  
51  
52  
53  
54  
55  
56  
57  
58  
59  
60

1  
2  
3  
4  
5  
6  
7  
8  
9  
10  
11  
12  
13  
14  
15  
16  
17  
18  
19  
20  
21  
22  
23  
24  
25  
26  
27  
28  
29  
30  
31  
32  
33  
34  
35  
36  
37  
38  
39  
40  
41  
42  
43  
44  
45  
46  
47  
48  
49  
50  
51  
52  
53  
54  
55  
56  
57  
58  
59  
60

| Site               | Male<br>6 to 11 years | Female<br>6 to 11 years | Male<br>12 to 16 years | Female<br>12 to 16 years | Total       |
|--------------------|-----------------------|-------------------------|------------------------|--------------------------|-------------|
| Bangalore          | 60                    | 60                      | 60                     | 60                       | 240         |
| Bhubaneswar        | 60                    | 60                      | 60                     | 60                       | 240         |
| Chandigarh         | 60                    | 60                      | 60                     | 60                       | 240         |
| Dibrugarh          | 60                    | 60                      | 60                     | 60                       | 240         |
| Jodhpur            | 60                    | 60                      | 60                     | 60                       | 240         |
| Lucknow            | 60                    | 60                      | 60                     | 60                       | 240         |
| Manipal            | 60                    | 60                      | 60                     | 60                       | 240         |
| Patna              | 60                    | 60                      | 60                     | 60                       | 240         |
| Srinagar           | 60                    | 60                      | 60                     | 60                       | 240         |
| Thiruvananthapuram | 60                    | 60                      | 60                     | 60                       | 240         |
| <b>Total</b>       | <b>600</b>            | <b>600</b>              | <b>600</b>             | <b>600</b>               | <b>2400</b> |

Distribution of participants based on gender and age group across ten study sites.

324x182mm (96 x 96 DPI)

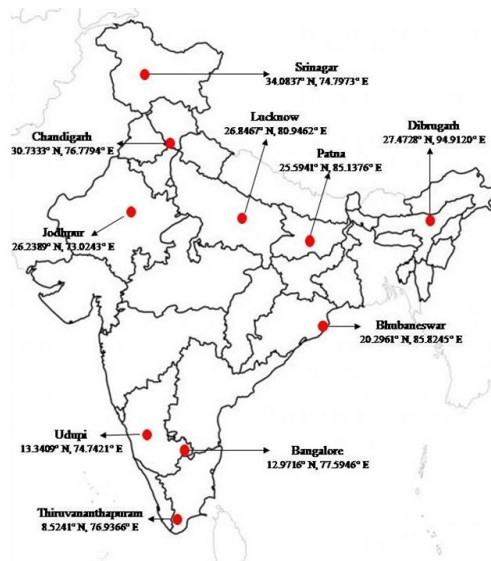

Study sites and their geo-coordinates

338x190mm (96 x 96 DPI)



# BMJ Open

## Prevalence of specific micronutrient deficiencies in urban school going children of India aged between 6-16 years: study protocol for a multicentric cross-sectional study

|                                 |                                                                                                                                                                                                                                                                                                                                                                                |
|---------------------------------|--------------------------------------------------------------------------------------------------------------------------------------------------------------------------------------------------------------------------------------------------------------------------------------------------------------------------------------------------------------------------------|
| Journal:                        | <i>BMJ Open</i>                                                                                                                                                                                                                                                                                                                                                                |
| Manuscript ID                   | bmjopen-2020-046783.R1                                                                                                                                                                                                                                                                                                                                                         |
| Article Type:                   | Protocol                                                                                                                                                                                                                                                                                                                                                                       |
| Date Submitted by the Author:   | 27-May-2021                                                                                                                                                                                                                                                                                                                                                                    |
| Complete List of Authors:       | Awasthi, Shally; King George Medical University, Pediatrics<br>Kumar, Divas; King George's Medical University, Pediatrics<br>Singh, Shweta; King George's Medical University, Psychiatry<br>Dixit, Swati; King George's Medical University, Pediatrics<br>Agarwal, Girdhar; University of Lucknow, Biostatistics<br>Mahdi, Abbas; King George Medical University, Biochemistry |
| <b>Primary Subject Heading</b>: | Public health                                                                                                                                                                                                                                                                                                                                                                  |
| Secondary Subject Heading:      | Nutrition and metabolism, Paediatrics, Public health, Research methods                                                                                                                                                                                                                                                                                                         |
| Keywords:                       | NUTRITION & DIETETICS, Community child health < PAEDIATRICS, PUBLIC HEALTH                                                                                                                                                                                                                                                                                                     |
|                                 |                                                                                                                                                                                                                                                                                                                                                                                |

SCHOLARONE™  
Manuscripts



I, the Submitting Author has the right to grant and does grant on behalf of all authors of the Work (as defined in the below author licence), an exclusive licence and/or a non-exclusive licence for contributions from authors who are: i) UK Crown employees; ii) where BMJ has agreed a CC-BY licence shall apply, and/or iii) in accordance with the terms applicable for US Federal Government officers or employees acting as part of their official duties; on a worldwide, perpetual, irrevocable, royalty-free basis to BMJ Publishing Group Ltd ("BMJ") its licensees and where the relevant Journal is co-owned by BMJ to the co-owners of the Journal, to publish the Work in this journal and any other BMJ products and to exploit all rights, as set out in our [licence](#).

The Submitting Author accepts and understands that any supply made under these terms is made by BMJ to the Submitting Author unless you are acting as an employee on behalf of your employer or a postgraduate student of an affiliated institution which is paying any applicable article publishing charge ("APC") for Open Access articles. Where the Submitting Author wishes to make the Work available on an Open Access basis (and intends to pay the relevant APC), the terms of reuse of such Open Access shall be governed by a Creative Commons licence – details of these licences and which [Creative Commons](#) licence will apply to this Work are set out in our licence referred to above.

Other than as permitted in any relevant BMJ Author's Self Archiving Policies, I confirm this Work has not been accepted for publication elsewhere, is not being considered for publication elsewhere and does not duplicate material already published. I confirm all authors consent to publication of this Work and authorise the granting of this licence.

1 **Prevalence of specific micronutrient deficiencies in urban school going children of India aged**  
2 **between 6-16 years: study protocol for a multicentric cross-sectional study**  
3  
4

5 ShallyAwasthi<sup>1\*</sup>, Divas Kumar<sup>1</sup>, Shweta Singh<sup>2</sup>, Swati Dixit<sup>1</sup>, Girdhar Agarwal<sup>3</sup>, Abbas Ali  
6 Mahdi<sup>4</sup>.  
7  
8

9 Corresponding Author – Shally Awasthi, Department of Pediatrics, King George’s Medical  
10 University, Shahmina Road, Chowk, Lucknow, Uttar Pradesh, India. Email: shally07@gmail.com  
11  
12

13  
14 <sup>1</sup>Department of Pediatrics, King George’s Medical University, Lucknow, Uttar Pradesh, India.  
15

16 <sup>2</sup>Department of Psychiatry, King George’s Medical University, Lucknow, Uttar Pradesh, India.  
17  
18

19 <sup>3</sup>Department of Biostatistics, University of Lucknow, Lucknow, Uttar Pradesh, India.  
20  
21

22 <sup>4</sup>Department of Biochemistry, King George’s Medical University, Lucknow, Uttar Pradesh, India,  
23 Uttar Pradesh, India.  
24  
25

26 Word count (excluding title page, abstract, references, figures and tables) - 4746  
27  
28  
29  
30  
31  
32  
33  
34  
35  
36  
37  
38  
39  
40  
41  
42  
43  
44  
45  
46  
47  
48  
49  
50  
51  
52  
53  
54  
55  
56  
57  
58  
59  
60

## ABSTRACT

### Introduction

Childhood and adolescence are the period of rapid physical and cognitive growth and development, requiring adequate nutrition. Malnutrition in the form of undernutrition or micronutrient deficiency or overweight/obesity affects the health, cognition and educational achievement of this age group. The objective this study is to assess the prevalence of Calcium, Iron, Zinc, Selenium, folate, Vitamin A, 25 Hydroxy Vitamin D and Vitamin B12 deficiencies in the serum and Hemoglobin, Ferritin and Lead levels and its association with reported dietary intake and cognitive abilities, in urban school going children aged 6 to 16 years in ten cities of India.

### Methods and analysis

A multi-centric cross-sectional study will be conducted to recruit 2400 participants (240 per site) across India. Participants will be selected using random sampling and will be categorized into age groups of 6 to 11 years and 12 to 16 years, with equal distribution. Data on socio economic status, anthropometric measures and three-day dietary intake and cognitive performance will be collected. Blood samples will be collected for biochemical analysis of micronutrients. Findings will estimate the prevalence of micronutrient deficiencies and their association with dietary habits and cognitive functioning.

### Ethics and dissemination

Study protocol has been reviewed and approved by institutional ethics committee of all ten participating sites. Results will be shared and published in a peer-reviewed journal so that the findings will be helpful for the stakeholders in planning nutritional interventions for targeted groups.

**Trial registration number** CTRI/2019/02/017783.

### Key words

Malnutrition, micronutrients, school age children, adolescents, cognitive, diet

## Strengths and limitations of this study

- Multicentric study with sites being representative of different geo-cultural regions of India.
- As a concern of power of study, will enroll 2400 urban school going children.
- Use of standardized cognitive assessment tools adapted for Indian children.
- Chances of recall bias during self-reported dietary survey.

## INTRODUCTION

Childhood and adolescence are the period of rapid physical and cognitive growth and development, requiring adequate nutrition. Any change in nutritional status during this age influences health, learning and physical fitness. Nutrients essential for normal growth and functioning of human body are macronutrients like carbohydrate, fat and proteins, required in large quantities and micronutrients like vitamins and minerals required in small quantities. Vitamins, categorized as fat soluble (A, D, E and K) and water soluble (B group and C), are synthesized in human body in quantities lesser than required. Minerals are required for growth, repair and regulation of vital functions of human body. They are major minerals like calcium, phosphorus, sodium, potassium, magnesium and trace elements like iron, iodine, ferritin, fluoride, zinc, copper, cobalt, chromium, manganese, molybdenum, selenium and nickel.

The term malnutrition addresses three broad groups of conditions:

- Undernutrition: Indicating wasting (low weight-for-height), stunting (low height-for-age) and underweight (low weight-for-age)
- Micronutrient-related malnutrition: micronutrient deficiencies or excess
- Overweight and obesity

Micronutrient deficiencies affect an estimated two billion people, or almost one-third of the world's population (1). Various studies had reported the sub optimal nutritional status of Indian children. Prevalence of anemia in school children and adolescents is between 19-88% across five different cities in India (2) and may be attributed to inadequate food intake, poor stores and deficiencies of nutrients (3). Nutrition anemia is caused by deficiency of iron, folate and vitamin B 12 (4). The association between nutritional status and health, cognition and educational achievement is established among the school going children (5). Deficiency of micronutrients and nutrients, delays cognitive and motor development and is associated with low Intelligence Quotient (IQ) (6,7,8). There is a consensus on the fact that iron deficiency has a negative impact on

1 cognition, behavior, and motor skills. It has been found that, hemoglobin though correlates to  
2 cognitive performance, iron supplementation improves cognitive functions regardless of the  
3 hemoglobin levels (9). Vitamin B12 deficiency is associated with poor cognitive development e.g.  
4 episodic memory and language ability (10) and growth in children (11). Zinc, Iron, folate, iodine,  
5 B12 and protein deficiency can also result in low IQ (12) and deficits in attention, learning,  
6 memory, and neuropsychological behavior (13,14). Lead, a well-known toxic heavy metal, though  
7 widely discontinued in many countries of world, is still a public health problem in developing  
8 countries like India. Worldwide every year 0.6 million cases of childhood intellectual disabilities  
9 are attributed to lead exposure. Iron deficiency, which is common in children can enhance lead  
10 absorption (15).

11 Various studies across the globe had tested the association between nutritional status biomarkers  
12 and dietary intake (16-20). Some significant association or role in progression of various  
13 malnutrition issues are already established. Plasma concentrations of vitamin B12 and folate are  
14 found to be associated with dietary intake provided that gender, age and energy intake are taken  
15 into account and this association is independent of physical activity of individual (21). A similar  
16 significant positive correlation is found between selenium intake and its blood level (22). Although  
17 some authors consider the nutritional assessment as a practical, noninvasive, and cost-effective  
18 tool for rapid nutritional evaluation (23), but others recommend concurrent collection of biological  
19 specimens to estimate levels of dietary biomarkers, so as to overcome possible sources of error,  
20 indigenously associated with every method of dietary intake assessment (24).

21 In Indian scenario, there is definitely a need for well-planned, large-scale study using standardized  
22 methodologies to estimate the prevalence of micronutrient deficiencies with giving due importance  
23 to accurate evaluation of socio-economic status and representation of the different regions of the  
24 country (25).

25 Hence the present study will be conducted with an aim to assess the prevalence of deficiency of  
26 various vitamins (folate, Vitamin A, 25 Hydroxy Vitamin D, Vitamin B12) and minerals (Calcium,  
27 Iron, Zinc, Selenium) and its association with reported dietary intake and cognitive abilities, in  
28 urban school children aged 6 to 16 years in ten cities of India.

## 29 **METHODOLOGY**

### 30 **Study design**

This is a multi-centric cross-sectional study. It will be conducted in ten major cities across India. Each site will recruit 240 participants, having equal proportion of gender and age group (Figure 1).

### Study setting

Study sites at Bangalore, Bhubaneswar, Chandigarh, Dibrugarh, Jodhpur, Lucknow, Patna, Srinagar, Thiruvananthapuram and Udupi districts are selected as being representative of different geo-cultural regions of India (Figure 2). King George's Medical University (KGMU), Lucknow will be the central coordinating unit (CCU) for the study.

These ten cities have a total population of 24.1 million, which is 2% of country's total population. Study cohort population in these cities was 7.1 million (26). Demographic characteristics and key anthropometric indicators in urban areas of study sites are shown in table 1 (26,27).

| Study Site                                              | Urban population of district (in millions) (26) |               | Literacy rate (state) (11) | Prevalence rate of (state) (age in years) (27) |       |       |           |       |       |
|---------------------------------------------------------|-------------------------------------------------|---------------|----------------------------|------------------------------------------------|-------|-------|-----------|-------|-------|
|                                                         | All ages                                        | 6 to 16 years |                            | Severe thinness*                               |       |       | Obesity** |       |       |
|                                                         |                                                 |               |                            | 5-9                                            | 10-14 | 15-19 | 5-9       | 10-14 | 15-19 |
| India                                                   | 377.11                                          | 76.73         | 84.1                       | 4.7                                            | 7.0   | 4.9   | 2.8       | 2.5   | 1.8   |
| M S Ramaiah Medical College & Hospital Bangalore        | 8.75                                            | 1.42          | 85.8                       | 5.2                                            | 3.4   | 4.0   | 2.4       | 1.5   | 8.0   |
| Kalinga Institute of Medical Sciences, Bhubaneswar      | 1.08                                            | 0.20          | 85.7                       | 1.5                                            | 2.5   | 0.4   | 8.9       | 9.1   | 4.5   |
| Post Graduate Institute of Medical Sciences, Chandigarh | 1.03                                            | 0.20          | 86.2                       | -                                              | -     | -     | -         | -     | -     |
| Assam Medical College, Dibrugarh                        | 0.24                                            | 0.043         | 88.5                       | 4.3                                            | 11.9  | 5.7   | 4.3       | 2.2   | 0.0   |
| All India Institute of Medical Sciences, Jodhpur        | 1.27                                            | 0.29          | 79.7                       | 4.3                                            | 7.4   | 5.4   | 1.3       | 1.5   | 1.7   |

|                                  |                                                                                                                                  |      |      |      |     |     |     |     |     |     |
|----------------------------------|----------------------------------------------------------------------------------------------------------------------------------|------|------|------|-----|-----|-----|-----|-----|-----|
| 1<br>2<br>3<br>4<br>5            | King George's<br>Medical University,<br>Lucknow                                                                                  | 3.04 | 0.64 | 75.1 | 5.9 | 6.6 | 3.3 | 2.0 | 1.0 | 0.0 |
| 6<br>7<br>8<br>9<br>10           | All India Institute of<br>Medical Sciences,<br>Patna                                                                             | 2.52 | 0.62 | 76.9 | 5.5 | 7.6 | 3.2 | 0.8 | 0.2 | 0.2 |
| 11<br>12<br>13<br>14<br>15       | Sher-i-Kashmir<br>Institute of Medical<br>Sciences, Srinagar                                                                     | 1.22 | 0.24 | 77.1 | 2.9 | 2.4 | 5.0 | 4.3 | 3.0 | 2.2 |
| 16<br>17<br>18<br>19<br>20<br>21 | Government Medical<br>College,<br>Thiruvananthapuram                                                                             | 1.77 | 0.28 | 95.1 | 2.9 | 4.1 | 6.4 | 5.4 | 1.8 | 0.8 |
| 22<br>23<br>24<br>25<br>26       | Kasturba Medical<br>College, Manipal,<br>Udupi                                                                                   | 0.33 | 0.05 | 85.8 | 5.2 | 3.4 | 4.0 | 2.4 | 1.5 | 8.0 |
| 27<br>28<br>29<br>30             | * BMI for age < -3 SD of the WHO Child Growth Standards median<br>** BMI for age >+2 SD of the WHO Child Growth Standards median |      |      |      |     |     |     |     |     |     |

## Objective

The primary objective of study is to assess the prevalence of Calcium, Iron, Zinc, Selenium, folate, Vitamin A, 25 Hydroxy Vitamin D and Vitamin B12 deficiencies and blood Hemoglobin, Ferritin and Lead levels in urban school going children aged 6 to 16 years in ten cities of India.

Secondary objectives are:

- (a) To assess the association of Calcium, Iron, Zinc, Selenium, folate, Vitamin A, 25 Hydroxy Vitamin D and Vitamin B12 deficiencies and blood Hemoglobin, Ferritin and Lead levels with anthropometric indicators in urban school going children aged 6 to 16 years in ten cities of India.
- (b) To assess the association of Calcium, Iron, Zinc, Selenium, folate, Vitamin A, 25 Hydroxy Vitamin D and Vitamin B12 deficiencies and blood Hemoglobin, Ferritin and Lead levels with socioeconomic status in urban school going children aged 6 to 16 years in ten cities of India.
- (c) To assess the association of Calcium, Iron, Zinc, Selenium, folate, Vitamin A, 25 Hydroxy Vitamin D and Vitamin B12 deficiencies and blood Hemoglobin, Ferritin and Lead levels



1 with cognitive assessments in urban school going children aged 6 to 16 years in ten cities  
2 of India, by  
3

- 4 • General Intelligence (Colored Progressive Matrices (CPM), Standard Progressive  
5 Matrices (SPM)  
6
- 7 • Attention, concentration and Visuo-motor coordination (Coding Test)  
8
- 9 • Working Memory (Digit span Test, Arithmetic test)  
10

11 (d) To assess the association of Calcium, Iron, Zinc, Selenium, folate, Vitamin A, 25 Hydroxy  
12 Vitamin D and Vitamin B12 deficiencies and blood Hemoglobin, Ferritin and Lead levels  
13 with three-day dietary intake assessed by 24 hours recall method in urban school going  
14 children aged 6 to 16 years in ten cities of India.  
15  
16  
17

### 18 **Sample size computation**

19 Assuming the prevalence of folate deficiency in India as 30.7% (28), precision of 2% and level of  
20 confidence 0.05, the calculated sample size is 2044 participants. After taking, attrition rate of 10%  
21 sample size will inflate to 2400 participants. This sample size will be equally divided in ten sites  
22 respectively.  
23  
24  
25  
26

### 27 **Sampling technique**

28 Participants will be selected by using two-stage sampling technique. In the first stage, schools will  
29 be selected, and in the second stage participants will be recruited from the selected schools.  
30  
31  
32

### 33 **Selection of participants**

34 Each study site will provide a list of schools imparting co-education to children between 6 to 16  
35 years of age and located within the urban limits of city. From this list, schools will be randomized  
36 repeatedly till we get a pool of six schools having at least one to three private schools and rest of  
37 the government schools. Principals of recruited schools will be met to obtain written voluntarily  
38 informed consent. They will be asked to allocate a coordinating teacher from the school. With the  
39 help of coordinating teacher, a gender-wise list of students between 6 to 11 and 12 to 16 years of  
40 age will be prepared. From each of these lists, fifteen students who are apparently healthy and  
41 residing within five kilometers of radius from school will be randomly selected. They will be  
42 invited to participate into the study. Out of these, first ten participants whose parents will provide  
43 written informed consent will be included into the study. Rest will be kept as back-up in case of  
44 exclusions. Participants having body mass index (BMI) below 12.5 will be excluded from the study  
45 and their parents will be advised to have a medical evaluation. Written assent will be obtained  
46 from all participants who will be 8 years or above of age. Any study specific assessment will be  
47 done after obtaining written informed consent.  
48  
49  
50  
51  
52  
53  
54  
55  
56  
57  
58  
59  
60

## Training of study team

Site team will consist of a social worker, a data entry operator, a Nutritionist and a Psychologist. Training of Nutritionist and Psychologist will be conducted at CCU Lucknow by project investigators and co-investigators. These will be oriented to train the site staff on study protocol, procedures, data collection instruments, data entry tools and standard operating procedures.

## Data collection

The study opened for data collection in April 2019 and is still ongoing due to COVID-19 pandemic and is expected to complete by mid of 2021. Since, the school calendar of different states of India varies from another owing to their specific geography, culture and climate, time frame of data collection across the sites also varies accordingly.

### Demographic and socioeconomic data

Demographic and socioeconomic details of participant will be recorded by interviewing participants and their primary care giver. Revised Kuppuswamy's socioeconomic scale (29) will be used to assess socioeconomic status.

### Anthropometric measurements

Anthropometry will be done by qualified and trained nutritionists. The height will be measured to the nearest 0.1 centimeter using Seca 213 Mobile Stadiometer (Seca, Hamburg, Deutschland). Participant will be asked to stand barefoot after removing hair barrettes & rubber bands, with the heels, back, and head touching the measuring rod. A head board placed above the head perpendicular to the ruler on measuring rod and parallel to the ground will be used to record height measure. Two measurements of height will be taken for each participant. If the difference between the two height measurements is greater than 5 mm, then a second set of two height measurements will be taken to obtain more precise values.

Weight will be measured to the nearest 0.1 kilogram using portable Seca 803 weighing scale (Seca, Hamburg, Deutschland). The unit will be standardized by calibrating it to zero before each measurement. The participants will be weighed barefoot with empty pockets and without any heavy items like woolen blazers or belts.

Body Mass Index (BMI) will be calculated using the standard equation:

$$\text{BMI} \left( \frac{\text{kg}}{\text{m}^2} \right) = \text{Weight (in kg)} / [\text{Height (in m)}]^2$$

For assessing anthropometric indicators, recommendations of the WHO expert committee will be used as shown in table 2.

Table 2: Recommendations of the WHO expert committee for assessing anthropometric indicators

|                 |   |                                                                   |
|-----------------|---|-------------------------------------------------------------------|
| Stunting        | : | Height for age $< -2$ SD of the WHO Child Growth Standards median |
| Severe thinness | : | BMI for age $< -3$ SD of the WHO Child Growth Standards median    |
| Thinness        | : | BMI for age $< -2$ SD of the WHO Child Growth Standards median    |
| Overweight      | : | BMI for age $> +1$ SD of the WHO Child Growth Standards median    |
| Obesity         | : | BMI for age $> +2$ SD of the WHO Child Growth Standards median    |
| Severe obesity  | : | BMI for age $> +3$ SD of the WHO Child Growth Standards median    |

### Cognitive assessment

Cognitive assessment will be administered at a mutually convenient time in a separate room to keep relaxed and pleasant environment. The assessment will be conducted in a single individual session. During the assessment session, the psychologist will first make the child comfortable by establishing good rapport. Each participant will be assessed for attention, concentration and visuo-motor coordination through coding test (30), general intelligence through colored progressive matrices (CPM) (31)/ standard progressive matrices (SPM) (32) and working memory using arithmetic and digit span test (30).

*Coding test:* Sheet 'A' will be used for participants below 8 years of age, rest will use sheet 'B' sheet. Participants will be given 120 seconds to complete the test. One point will be awarded for each correct response, excluding samples.

*CPM/SPM:* CPM will be administered to participants 6 to 11 years of age. Participants 12 years or above of age will be given SPM. Each participant will be given about 15 to 20 minutes to complete the assessment.

*Arithmetic and digit span test:* These will be undertaken by all the participants. 3 to 5 minutes will be given to complete digit span test and 10 minutes will be given for arithmetic test.

For scoring and interpretation of test results, standard tables from respective test's manual (30,31,32) will be referred.

### Dietary assessment

General dietary assessment will include dietary habits, meal frequency and consumption of water, beverages, green leafy vegetables, fruits, animal products. Frequencies of common food items, popular among children will also be captured.

Data on dietary intake of children will be collected using 24hour recall method for two non-consecutive days and one Sunday, which are not fasting or feasting days. The intake will be recorded by interviewing participant along with his/her mother or primary caregiver, preferably at their home. Previously standardized cups, glass and spoons will be used as an aid to help in

1 recalling the quantity of different foods consumed by the participants in a 24 hour period prior to  
2 the investigation.  
3

4 For calculating the nutritive value of raw ingredients, Nutritive value of Indian foods will be used  
5 (33). Daily nutrient intake for all the nutrients will be calculated using DIETSOFT Software and  
6 will be compared with the Recommended Dietary Allowances (34).  
7  
8

9  
10 Dietary intake will be assessed in terms of Nutrient Adequacy Ratio (NAR)(35). The NAR for a  
11 given nutrient is the ratio of a participant's intake to the current recommended allowance for each  
12 sex and age category. To estimate the nutrient adequacy of the diet, NAR will be calculated for all  
13 the nutrients using the equation:  
14  
15

16  
17  
18 
$$\text{NAR} = \text{Participant's nutrient intake of a day} / \text{RDA of the respective nutrient}$$
  
19

20 Participants will be then categorized as having (a) Adequate NAR ( $\text{NAR} \geq 1.00$ ), (b) Fairly  
21 adequate NAR ( $0.66 > \text{NAR} < 1.00$ ) and Inadequate NAR ( $\text{NAR} < 0.66$ ), for various nutrients (35).  
22  
23

24 Dietary diversity (DD), defined as the number of different foods or food groups consumed in a  
25 day, will be measured using Dietary Diversity Score (DDS). DDS will be measured by  
26 categorizing the food items, consumed in a day, into fourteen groups. Simple counting of different  
27 types of food groups consumed in a particular day will give individual DDS, which would range  
28 from 1 to 14.  
29  
30  
31  
32

33  
34 Thereafter, participants will be categorized in three classes according to their Dietary Diversity  
35 Score (36)-  
36

- 37 1. Low:  $\leq 8$
- 38 2. Moderate: 9
- 39 3. High:  $\geq 10$
- 40
- 41
- 42
- 43

44 The fourteen food groups that we would use are animal meat, cereals and millets, fats and edible  
45 oils, meat and poultry, fishes and other sea foods, fruits, pulses and legumes, green leafy  
46 vegetables, milk and milk products, nuts and oil seeds, other vegetables, roots and tubers, sugars  
47 and miscellaneous foods.  
48  
49  
50

51  
52 Blood sample collection, processing and storage  
53

54 Blood sampling will be done at school in presence of parent/s where available, during early school  
55 hours, by trained phlebotomists. Venous blood sample of 6 ml (4 ml in clot activator and 2 ml in  
56 EDTA) will be collected using vacuum-tube systems using a certified stainless steel hypodermic  
57  
58  
59

needle, preferably from cubital vein. Measures to prevent and counter any adverse event like syncope, hematoma or swelling will be adequately employed and recorded.

Blood sample transportation from school to study sites will be done maintaining temperature of 2°C to 8°C. One ml of EDTA sample will be send to a centralized laboratory (National Accreditation Board for Testing and Calibration Laboratories (NABL) and The College of American Pathologists (CAP) accredited) for complete blood count (CBC) assessment, through a professional agency having experience in handling and air-transportation of blood samples. The CBC assessment will include estimation of hemoglobin, hematocrit, red blood cell count, mean corpuscular volume, mean corpuscular hemoglobin, mean corpuscular hemoglobin concentration, RDW-CV, platelet count, total leucocyte count, differential leucocyte count and absolute leucocyte count. Report of CBC assessment will be given to parents with relevant advice by site investigators. Rest of the samples will be processed at site to separate plasma, serum and packed cells, in a trace element free area. Plasma and serum will be stored in trace element-free cyro tubes, below -20°C and packed cells between 2°C to 8°C, at the study sites, with restricted access. Samples from study sites to CCU will be transported in two batches of 120 each, maintaining required temperatures. Sample transportation will be managed by professional agencies having expertise in handling and shipment of bio-medical samples. Samples will be prevented from exposure to light during this whole process.

#### Biochemical assessment

Biochemical analysis of blood samples will be carried out at Department of Biochemistry, KGMU. Levels of serum calcium, iron, ferritin, folate, Vitamin B-12, Vitamin D, Vitamin A, zinc, plasma selenium and lead in whole blood will be assessed.

Inductively coupled plasma-optical emission spectrometry (ICP-OES) (Optima 8000, Perkin Elmer) will be used to assess zinc, selenium and lead. Stock solutions for respective elements will be prepared at a concentration of 1000 mg/L. Working standard will be prepared by diluting stock solution in 2% nitric acid in desired range. Adding 0.5 ml of sample, 1.5 ml nitric acid, 0.5 ml of perchloric acid, 1.0 ml of hydrogen peroxide and 1.0 ml of Mili-Q water will do microwave digestion. A clear microwave digested sample will use to measure analytes using ICP-OES, maintaining operational conditions as shown in table 3.

Table 3: Operational conditions for Inductively coupled plasma-optical emission spectrometry

|                    |   |            |
|--------------------|---|------------|
| Plasma Gas Flow    | : | 8 L/min    |
| Auxiliary Gas Flow | : | 0.2 L/min  |
| Carrier Gas Flow   | : | 0.55 L/min |

|   |                  |   |            |
|---|------------------|---|------------|
| 1 | RF Power         | : | 1300 W     |
| 2 | View Distance    | : | 15 nm      |
| 3 | Plasma view      | : | Axial      |
| 4 | Sample flow rate | : | 1.0 ml/min |

8  
9  
10 The value of metal (zinc, selenium, lead) will be calculated using the formula:

$$11 \text{ Metal } \left( \mu_{\text{dl}}^{\text{g}} \right) = (\text{Sample reading} - \text{Blank reading}) \times \text{dilution made} \times 100 / \text{Sample taken (ml)}$$

12  
13  
14 Folate, Vitamin B 12, Vitamin D and ferritin levels will be determined using Chemiluminescence  
15 method using a fully automatic analyzer. Folate estimation will be done by using ARCHITECT  
16 Folate Reagent Kit (Abbot Diagnostics, Iceland), 1P74-27. The Immulite Folate is a competitive  
17 analog immunoassay with incubation cycles of  $2 \times 30$  minutes. For Vitamin B 12 assessment,  
18 ARCHITECT B12 Reagent Kit (Abbot Diagnostics, Iceland), 7K61-27 will be used. Immulite  
19 1000 vitamin B12 is a solid-phase, two-site chemiluminescent immunometric assay with  
20 incubation cycles of  $1 \times 60$  minutes. These estimations depend on chemiluminescence reactions  
21 in which part of the chemical energy generated produces excited intermediates that decay to a  
22 ground state with the emission of photons. The emitted radiation is measured using a  
23 photomultiplier tube and the signal is converted into analyte concentration.

24  
25  
26  
27  
28  
29  
30  
31  
32 The ARTICHECT 25-OH vitamin D Assay (5P02, G5-6832/R03, Abbot Diagnostics, Iceland)  
33 uses chemiluminescent immunoassay technology. Specific antibody to vitamin D is used for  
34 coating magnetic particles (solid phase) and vitamin D is linked to an isoluminol derivative. During  
35 the incubation, 25-hydroxyvitamin D is dissociated from its binding protein and competes with  
36 labelled vitamin D for binding sites on the antibody. After the incubation, the unbound material is  
37 removed with a wash cycle. Subsequently, the starter reagents are added and a flash  
38 chemiluminescent reaction is initiated. The light signal is measured by a photomultiplier as relative  
39 light units and is inversely proportional to the concentration of 25-hydroxyvitamin D present in  
40 samples. Quantitative determination of ferritin in serum will be done using ARTICHECT Ferritin  
41 7k59 kit, B7K590 (Abbot Diagnostics, Iceland).

42  
43  
44  
45  
46  
47  
48  
49  
50  
51 Vitamin A in serum will analyzed by immune-enzymatic assay (ELISA), using commercially  
52 available kit (CED051Ge, USCN Wuhan USCN Business Co., Ltd.) which is principally based  
53 on competitive ELISA. This assay employs the competitive inhibition enzyme immunoassay  
54 technique. A monoclonal antibody specific to retinol has been pre-coated onto a microplate. A  
55 competitive inhibition reaction is launched between biotin labeled retinol and unlabeled retinol  
56  
57  
58  
59

1 (Standards or samples) with the pre-coated antibody specific to retinol. After incubation the  
2 unbound conjugate is washed off. Next, avidin conjugated to Horseradish Peroxidase (HRP) is  
3 added to each microplate well and incubated. The amount of bound HRP conjugate is reverse  
4 proportional to the concentration of retinol in the sample. After addition of the substrate solution,  
5 the intensity of color developed is reverse proportional to the concentration of retinol in the  
6 sample.  
7  
8  
9  
10

11 Serum calcium will be measured by Fully Automatic Biochemistry Analyzer by Selectra PRO M,  
12 using Calcium Arsenazo III Colorimetric 30160, Lab kit. Calcium with Arsenazo III (1, 8-  
13 Dihydroxy-3, 6-disulpho-2, 7-naphthalene-bis (azo)-dibenzene-earsonic acid), at neutral pH, yields  
14 a blue colored complex. The intensity of the color formed is proportional to the calcium  
15 concentration in the sample.  
16  
17  
18  
19

20 Serum iron levels will be assessed using ELITech Clinical Systems Selectra Pro Series Analyzers  
21 (Iron ferene, FEFE-0203 *ELITechGroup* empowering IVD, USA.) Iron released from transferrin in  
22 acidic pH as ferric ion ( $\text{Fe}^{3+}$ ), is reduced by the ascorbic acid into ferrous ion ( $\text{Fe}^{2+}$ ) which eventually  
23 forms a colored complex with ferene. The 578 nm absorbance of the iron-ferene complex is proportional  
24 to the iron concentration of the sample.  
25  
26  
27  
28  
29

### 30 **Patient and public involvement**

31 Patients and/or the public are not involved in the design, or conduct, or reporting, or dissemination  
32 plans of this research.  
33  
34

### 35 **Quality assurance**

36 Robust mechanisms will be employed to maintain the quality of data collection. Data collection at  
37 sites will be done under direct supervision of Site Investigator / Co-Investigator. CCU will also  
38 monitor data quality by onsite monitoring to observe data collection process and ascertain work in  
39 accordance to laid SOPs. Quality of anthropometric measurements will be assured by routinely  
40 calibrating the equipment along with the resampling of participants. Scoring sheets for cognitive  
41 assessments will also be assessed for scoring and interpretation of results at CCU. Dietary records  
42 will be assessed for appropriateness of proportion of ingredients and entry in DIETSOFT software.  
43 Retraining will be imparted where lacunae will be identified. Internal quality assurance of bio  
44 chemical analysis will be done by using calibrated instruments and analyzing test specific  
45 standards. For interlaboratory comparison of the test results, 10% of the total samples will be sent  
46 to peer laboratory.  
47  
48  
49  
50  
51  
52  
53  
54  
55  
56  
57

### 58 **Statistical analysis**

1 Data will be entered in MS excel (Double data entry), matched electronically and discrepancies  
2 will be rectified by referring the source documents. Point estimates and confidence intervals of  
3 proportions of different micronutrient deficiencies shall be evaluated. These estimates shall be  
4 found for overall proportion as well as city-wise proportion. To assess the association of  
5 micronutrient deficiencies (continuous variables) with anthropometric measures (height and  
6 weight), Pearson's correlation coefficient shall be used along with their confidence intervals. To  
7 assess the association of micronutrient deficiencies (continuous variables) with cognitive  
8 assessments (categorical variables), analysis of variance shall be employed. The dietary intake, for  
9 each participant, is recorded for three days, which will be converted into nutritional value using  
10 DIETSOFT software. Using the three observations as repeated measurement for each participant,  
11 the appropriate "descriptive" as well as "inferential" analysis shall be done. The hierarchical  
12 (nested) linear model shall be used for analyzing repeated measures, or longitudinal data.

### 21 **Ethics and dissemination**

23 The study is approved by the Institutional Ethics Committee for MS Ramaiah Medical College  
24 and Hospital Bangalore (approval reference number (ARN): MSRMC/EC/AP-02/02-2019),  
25 Institutional Ethics Committee for Kalinga Institute of Medical Sciences Bhubaneswar (ARN:  
26 KIMS/KIIT/IEC/112/2016), Institutional Ethics Committee for PGIMER Chandigarh (ARN:  
27 PGI/IEC/2019/000152), Institutional Ethics Committee (H) Assam Medical College (ARN:  
28 AMC/EC/1430), Institutional Ethics Committee for All India Institute of Medical Sciences  
29 Jodhpur (ARN: AIIMS/IEC/2017/765), Institutional Ethics Committee for King Georges Medical  
30 University (ARN: 9334/Ethics/R.Cell-16), Institutional Ethics Committee for Kasturba Medical  
31 College (ARN: IEC:388/2019), Institutional Ethics Committee for All India Institute of Medical  
32 Sciences Patna (ARN: IEC/AIIMS/PAT/153/2017), Institutional Ethics Committee for Sher-i-  
33 Kashmir Institute of Medical Sciences (ARN: IEC/SKIMS Protocol # RP 175/2018) and Human  
34 Ethics Committee Medical College Thiruvananthapuram (ARN: HEC.No.04/34/2019/MCT). The  
35 study is registered prospectively with Clinical Trial Registry of India (registration number  
36 CTRI/2019/02/017783). Written informed consent will be obtained from parents of all study  
37 participants. Findings will be disseminated with stakeholders and will be presented in national and  
38 international conferences. Results will be published in a peer-reviewed journal.

### 51 **DISCUSSION**

53 Micronutrient deficiencies are a major problem in developing countries and India is not an  
54 exception. It adversely affects the population health resulting in decreased national performance  
55 and productivity, adding financial burden to the country. Despite the steps taken by government  
56 and productivity, adding financial burden to the country. Despite the steps taken by government  
57 and productivity, adding financial burden to the country. Despite the steps taken by government  
58 and productivity, adding financial burden to the country. Despite the steps taken by government  
59 and productivity, adding financial burden to the country. Despite the steps taken by government



1 through various food supplementation and food fortification programs, problem is still deep  
2 rooted. Large population of children and adolescents is still bearing the curse of micronutrient  
3 deficiencies (27,37-42). Several researchers have investigated the magnitude of problem in India  
4 at various time points. These studies were mostly isolated and were confined to anemia, ferritin,  
5 folate, vitamin B12 and vitamin D. In the recent times, much interest has been generated in  
6 multiple micronutrient deficiencies, little is known about the magnitude and significance of this  
7 problem. The evidence on interactions between micronutrients, however, clearly indicates a need  
8 for more work in this area (43). The present study, perhaps first of its kind, will provide the  
9 estimates of Calcium, Iron, Zinc, Selenium, Folate, Vitamin A, 25 Hydroxy Vitamin D and  
10 Vitamin B12 deficiencies and blood Hemoglobin, Ferritin and Lead levels its association with  
11 anthropometric indicators, socioeconomic status, cognitive abilities and dietary habits along with  
12 three-day dietary intake, at country level.

21 The dietary intake assessment of population provides important information on the frequency and  
22 distribution of diets and nutritional status. This information can be used in designing interventions  
23 targeting improvement in dietary habits at community level. A wide variety of methods are  
24 available for dietary assessment, each one having its own advantages and disadvantages. The 24-  
25 hour dietary recall method is the most widely used method. This is a subjective and retrospective  
26 method that requires face to face or telephonic interview and consists of precisely recalling,  
27 describing and quantifying the intake of foods and beverages consumed in the 24-hour period prior  
28 to, or during the day before the interview. Although the most thorough, comprehensive and  
29 complete instrument for dietary assessment, 24-hour dietary recall method has extensive  
30 dependence on interviewer's skills and participant's memory (44). In current study, since we will  
31 be assessing the actual level of micronutrients through biochemical analysis, at the same time we  
32 can correlate the results to that of 24-hour dietary recall.

42 Cognitive development is a continuous and sequential process from birth through adulthood.  
43 Cognition compasses memory, association, concept formation, pattern recognition, language,  
44 attention, perception, action, problem solving and mental imagery as a process (45,46). These  
45 processes are mandatory and interrelated for any task acquisition. Intelligence varies from person  
46 to person because of differences in their environmental and biological components. Biological  
47 factors like genes, maternal age and environmental factors like socioeconomic status, malnutrition,  
48 etc. influence intelligence adversely. Deficiency of micronutrients is associated with impaired  
49 neuropsychological development and classroom performance (47,48). Malnutrition during the  
50 early part of life (1–5 years) delays physical growth, motor and cognitive development (49-51).  
51 Studies have shown that skipping breakfast interferes with cognitive performance of students.

1 While there are several identified micronutrients, the role of only Iron, Zinc, Iodine, and vitamins  
2 is studied well in India. The researches clearly indicate that the school age period is nutritionally  
3 significant because this is the prime time to build up body stores of nutrients in preparation for  
4 rapid growth of adolescence.  
5

6 Hence, the findings of present study may add to the existing body of knowledge not only to the  
7 prevalence but also the association of micronutrient deficiencies with cognitive abilities, dietary  
8 patterns anthropometric indicators, socioeconomic status. These finding may be further scaled up  
9 to interventions to provide adequate nutrition to targeted groups, so as to promote health and  
10 cognitive abilities thus resulting in increased productivity.  
11

12 **Acknowledgement:** Indian Micronutrient Consortium (in alphabetical order): Abbas Ali Mahdi,  
13 King George's Medical University, Lucknow; Anish TS, Government Medical College,  
14 Thiruvananthapuram; B N Mahanta, Assam Medical College, Dibrugarh; Bhavneet Bharti, Post  
15 Graduate Institute of Medical Sciences, Chandigarh; C M Singh, All India Institute of Medical  
16 Sciences, Patna; Chythra R Rao, Kasturba Medical College, Manipal; Daisy Kheda, All India  
17 Institute of Medical Sciences, Jodhpur; Divas Kumar, King George's Medical University,  
18 Lucknow; Girdhar Agarwal, University of Lucknow, Lucknow; Joseph L Mathew, Post Graduate  
19 Institute of Medical Sciences, Chandigarh; Karunakara BP, M. S. Ramaiah Institute of Medical  
20 Sciences, Bangalore; Kuldeep Singh, All India Institute of Medical Sciences, Jodhpur; Mushtaq A  
21 Bhat, Sher-i-Kashmir Institute of Medical Sciences, Srinagar; Shally Awasthi, King George's  
22 Medical University, Lucknow; Shweta Singh, King George's Medical University, Lucknow;  
23 Somashekar AR, M. S. Ramaiah Institute of Medical Sciences, Bangalore; Sonali Kar, Kalinga  
24 Institute of Medical Sciences, Bhubaneswar; Suma Nair, Kasturba Medical College, Manipal;  
25 Swati Dixit, King George's Medical University, Lucknow, Tulika Goswami Mahanta, Assam  
26 Medical College, Dibrugarh.  
27

### 28 **Competing interests**

29 The authors declare that they have no competing interests.  
30

### 31 **Source of funding**

32 This work is supported by a grant from Hindustan Unilever Limited (Grant Number: 212332).  
33 Funding supports all study related expenses including manuscripts processing fees. Funding source  
34 is not involved in study design, implementation, collection and interpretation of data and in writing  
35 of the manuscript.  
36

### 37 **Author Contributions**

38 SA conceived the study and is principal investigator, responsible for finalizing study protocol and  
39 manuscript. DK contributed to design of the final study protocol, drafted the initial manuscript and  
40

1 coordinated ethical approvals. SS, SD and AAM contributed to the technical design of final study  
2 protocol and revised the initial manuscript draft. GA provided biostatistical support. IMC are site  
3 investigators and contributed in the design of the final study protocol.  
4  
5

### 6 **Patient consent for publication**

7 Not required.  
8

### 9 **Data statement**

10 **Results** from this protocol will be published in a peer reviewed journal. Alternatively, data can be  
11 provided on request to corresponding author.  
12  
13  
14  
15

### 16 **REFERENCES:**

- 17 1. Thompson B & Amoroso L (editors) (2014) *Improving Diets and Nutrition: Food-Based*  
18 *Approaches*. Rome and Wallingford: FAO and CAB International.
- 19 2. Srihari G, Eilander A, Muthayya S, Kurpad A V., Seshadri S. Nutritional status of affluent  
20 indian school children: What and how much do we know? *Indian Pediatr.* 2007;44(3):204–  
21 13.
- 22 3. Gomber S, Bhawna, Madan N, Lal A, Kela K. Prevalence & etiology of nutritional anaemia  
23 among school children of urban slums. *Indian J Med Res* 118, October 2003, pp 167-171
- 24 4. Gonmei Z, Toteja GS. Micronutrient status of Indian population. *Indian J Med Res.* 2018  
25 Nov; 148(5): 511–521. doi: 10.4103/ijmr.IJMR\_1768\_18
- 26 5. Best C, Neufingerl N, Van Geel L, Van Den Briel T, Osendarp S. The nutritional status of  
27 school-aged children: Why should we care? *Food Nutr Bull.* 2010;31(3):400–17.
- 28 6. Black, M. M. (2003). The evidence linking zinc deficiency with children's cognitive and  
29 motor functioning. *Journal of Nutrition*, 133, 1473S–1476S.
- 30 7. Gowri, A.R. and Sangunam, H.J. (2005) 'Assessment of mental and motor abilities of  
31 school going children with anaemia', *Indian Journal of Nutrition and Dietetics*, Vol. 42,  
32 pp.99–105.
- 33 8. Schoenthaler, S. J., Bier, I. D., Young, K., Nichols, D. & Janssens, S. (2000). The effect  
34 of vitamin-mineral supplementation on the intelligence of American schoolchildren: a  
35 randomized, double-blind placebo-controlled trial. *J Altern Complement Med* 6(1): 19-29.
- 36 9. Jáuregui-Lobera I. Iron deficiency and cognitive functions. *Neuropsychiatr Dis Treat.*  
37 2014;10:2087-2095. Published 2014 Nov 10. doi:10.2147/NDT.S72491

10. Castillo-Duran C, Perales CG, Hertrampf ED, Marin VB, Rivera FA, Icaza G. (2001). Effect of zinc supplementation on development and growth of Chilean infants. *J Pediatr*. 138:229-35.
11. Strand, T. A., Taneja, S., Ueland, P. M., Refsum, H., Bahl, R., Schneidem, J., Bhandari, N. (2013). Cobalamin and folate status predict mental development scores in North Indian children 12–18 months of age. *American Journal of Clinical Nutrition*, 97, 310–317.
12. Schoenthaler, S. J., Bier, I. D., Young, K., Nichols, D. & Janssens, S. (2000). The effect of vitamin-mineral supplementation on the intelligence of American schoolchildren: a randomized, double-blind placebo-controlled trial. *J Altern Complement Med* 6(1): 19-29.
13. Lozoff, B., Georgieff, M. K. Iron deficiency and brain development. *Semin Pediatr Neurol*. 2006;13:158-65.
14. Long Fung Lam, Tanya R. Lawlis, Feeding the brain – The effects of micronutrient interventions on cognitive performance among school-aged children: A systematic review of randomized controlled trials, *Clinical Nutrition*, Volume 36, Issue 4, 2017, Pages 1007-1014, ISSN 0261-5614, <https://doi.org/10.1016/j.clnu.2016.06.013>.
15. Valeria I. Naranjo, Michael Hendricks, Kimberly S. Jones, Lead Toxicity in Children: An Unremitting Public Health Problem, *Pediatric Neurology*, Volume 113, 2020, Pages 51-55, ISSN 0887-8994, <https://doi.org/10.1016/j.pediatrneurol.2020.08.005>.
16. Kim, KN., Oh, SY. & Hong, YC. Associations of serum calcium levels and dietary calcium intake with incident type 2 diabetes over 10 years: the Korean Genome and Epidemiology Study (KoGES). *Diabetol Metab Syndr* 10, 50 (2018). <https://doi.org/10.1186/s13098-018-0349-y>
17. Lim, Karen & Booth, Alison & Szymlek-Gay, Ewa & Gibson, Rosalind & Bailey, Karl & Irving, David & Nowson, Caryl & Riddell, Lynn. (2015). Associations between Dietary Iron and Zinc Intakes, and between Biochemical Iron and Zinc Status in Women. *Nutrients*. 7. 2983-99. 10.3390/nu7042983.
18. Institute of Medicine (US) Panel on Dietary Antioxidants and Related Compounds. *Dietary Reference Intakes for Vitamin C, Vitamin E, Selenium, and Carotenoids*. Washington (DC): National Academies Press (US); 2000. 7, Selenium. Available from: <https://www.ncbi.nlm.nih.gov/books/NBK225470/>
19. Dimakopoulos I, Magriplis E, Mitsopoulou AV, Karageorgou D, Bakogianni I, Micha R, Michas G, Chourdakis M, Ntouroupi T, Tsaniklidou SM, Argyri K, Panagiotakos DB, Zampelas A; HNNHS Contributors; HNNHS Advisory Committee. Association of serum

- 1 vitamin D status with dietary intake and sun exposure in adults. *Clin Nutr ESPEN*. 2019  
2 Dec;34:23-31. doi: 10.1016/j.clnesp.2019.09.008. Epub 2019 Oct 18. PMID: 31677707.
- 3  
4 20. Wolffenbuttel, B.H.R., Heiner-Fokkema, M.R., Green, R. et al. Relationship between  
5 serum B12 concentrations and mortality: experience in NHANES. *BMC Med* 18, 307  
6 (2020). <https://doi.org/10.1186/s12916-020-01771-y>  
7  
8  
9 21. Baart AM, Balvers MGJ, de Vries JHM, Ten Haaf DSM, Hopman MTE, Klein Gunnewiek  
10 JMT. Relationship between intake and plasma concentrations of vitamin B12 and folate in  
11 873 adults with a physically active lifestyle: a cross-sectional study. *J Hum Nutr Diet*.  
12 2021;34(2):324-333. doi:10.1111/jhn.12814  
13  
14  
15 22. Pestitschek M, Sonneck-Koenne C, Zakavi SR, Li S, Knoll P, Mirzaei S. Selenium intake  
16 and selenium blood levels: a novel food frequency questionnaire. *Wien Klin Wochenschr*.  
17 2013 Mar;125(5-6):160-4. doi: 10.1007/s00508-013-0334-2. Epub 2013 Mar 19. PMID:  
18 23508871).  
19  
20  
21 23. Vellas B, Guigoz Y, Baumgartner M, Garry PJ, Lauque S, Albarede JL. Relationships  
22 between nutritional markers and the mini-nutritional assessment in 155 older persons. *J*  
23 *Am Geriatr Soc*. 2000 Oct;48(10):1300-9. doi: 10.1111/j.1532-5415.2000.tb02605.x.  
24 PMID: 11037019.  
25  
26  
27 24. Naska A, Lagiou A, Lagiou P. Dietary assessment methods in epidemiological research:  
28 current state of the art and future prospects. *F1000Res*. 2017;6:926. Published 2017 Jun  
29 16. doi:10.12688/f1000research.10703.1  
30  
31  
32 25. G. Srihari, A. Eilander, S. Muthayya, A.V. Kurpad and S. Seshadri; Nutritional Status of  
33 Affluent Indian School Children: What and How Much Do We Know? *Indian Pediatrics*  
34 2007; 44:199-203  
35  
36  
37 26. Chandramouli C, General R. Census of India 2011. Provisional Population Totals. New  
38 Delhi: Government of India. 2011. Available at: [http://censusindia.gov.in/2011-prov-](http://censusindia.gov.in/2011-prov-results/prov_results_paper1_india.html)  
39 [results/prov\\_results\\_paper1\\_india.html](http://censusindia.gov.in/2011-prov-results/prov_results_paper1_india.html).  
40  
41  
42 27. Ministry of Health and Family Welfare (MoHFW), Government of India, UNICEF and  
43 Population Council. 2019. Comprehensive National Nutrition Survey (CNNS) National  
44 Report. New Delhi.  
45 <https://nhm.gov.in/index1.php?lang=1&level=2&sublinkid=1332&lid=713>  
46  
47  
48 28. Umesh Kapil and Neha Sareen. Prevalence of Ferritin, Folate and Vitamin B12  
49 Deficiencies Amongst Children in 5–18 years of Age in Delhi. *Indian J Pediatr*  
50 2014;81(3):312.  
51  
52  
53  
54  
55  
56  
57  
58  
59  
60

- 1 29. Sharma Rahul. Revised Kuppaswamy's Socioeconomic Status Scale: Explained and  
2 Updated. *Indian Pediatr* 2017;54:867-870.
- 3  
4 30. Malin, A. J. (1969). *Manual for Malin's intelligence Scale for Indian Children (MISIC)*.  
5 Lucknow: Indian Psychological Corporation.
- 6  
7 31. Raven, J., Raven, J. C., & Court, H. (1998). *Coloured Progressive Matrices*. 1998 Edition.  
8 USA: Harcourt Assessment.
- 9  
10 32. Raven, J., Raven, J. C., & Court, H. H. (2000). *Raven manual: Section 3. Standard*  
11 *Progressive Matrices*. Oxford: Oxford Psychologists Press, Ltd.
- 12  
13 33. Gopalan C, Rama Sastri B V, Balasubramanian SC, Narasinga Rao BS. *Nutritive value of*  
14 *Indian foods*. Hyderabad: National Inst. of Nutrition; 2007.
- 15  
16 34. Kamala K, Bhaskaram P, Bhat RV RT. *DIETARY GUIDELINES - A Manual*. Natl Inst  
17 Nutr [Internet]. 2011;3(1):139. Available from:  
18 <http://ninindia.org/DietaryGuidelinesforNINwebsite.pdf>
- 19  
20 35. Rani N, Rani V. *Assessment of Nutritional Status of School Going Adolescents in*  
21 *Fatehabad District of Haryana Research Article*. *Indian J Nutr*. 2016;3(2):1-5.
- 22  
23 36. Nithya DJ, Bhavani R V. *Dietary diversity and its relationship with nutritional status*  
24 *among adolescents and adults in rural India*. *J Biosoc Sci*. 2018;50(3):397-413.
- 25  
26 37. Tahmeed Ahmed, Muttaquina Hossain, Kazi Istiaque Sanin; *Ann Nutr Metab*  
27 2012;61(suppl 1):8-17; Jan 2013, DOI: 10.1159/000345165
- 28  
29 38. Kotecha, P.V., Lahariya, C. *Micronutrient supplementation and child survival in*  
30 *India*. *Indian J Pediatr* 77, 419-424 (2010). <https://doi.org/10.1007/s12098-010-0050-0>
- 31  
32 39. Kapil U, Bhadoria AS. *Prevalence of folate, ferritin and cobalamin deficiencies amongst*  
33 *adolescent in India*. *J Family Med Prim Care*. 2014;3:247-9.
- 34  
35 40. Bhardwaj A, Kumar D, Raina SK, Bansal P, Bhushan S, Chander V, et al. *Rapid*  
36 *assessment for coexistence of Vitamin B12 and iron deficiency anemia among adolescent*  
37 *males and females in Northern Himalayan state of India*. *Anemia*. 2013;2013:959605.
- 38  
39 41. Verma S. *Incidence of Vitamin B12 and folate deficiency amongst adolescents*. *Int J*  
40 *Contemp MedRes*. 2017;4:1755-7.
- 41  
42 42. Gupta A, Kapil U, Ramakrishnan L, Pandey RM, Yadav CP. *Prevalence of Vitamin B12*  
43 *and folate deficiency in school children residing at high altitude regions in India*. *Indian J*  
44 *Pediatr*. 2017;84:289-93.
- 45  
46 43. Usha Ramakrishnan; *Prevalence of Micronutrient Malnutrition Worldwide*; May 2002:  
47 (II)S46-S52; Downloaded from [https://academic.oup.com/nutritionreviews/article-](https://academic.oup.com/nutritionreviews/article-abstract/60/suppl_5/S46/1896146)  
48 [abstract/60/suppl\\_5/S46/1896146](https://academic.oup.com/nutritionreviews/article-abstract/60/suppl_5/S46/1896146)

- 1 44. Salvador Castell G, Serra-Majem L, Ribas-Barba L. What and how much do we eat? 24-  
2 hour dietary recall method. *Nutr Hosp.* 2015;31 Suppl 3:46-48. Published 2015 Feb 26.  
3 doi:10.3305/nh.2015.31.sup3.8750  
4  
5  
6 45. Best, J. B. (1999). *Cognitive Psychology* (5th ed.). pp. 15–17.  
7  
8 46. Coren, S., Lawrence, M. W., & James, T. E. (1999). *Sensation and Perception* (5th  
9 ed.). Harcourt Brace. ISBN 978-0-470-00226-1. p. 9  
10  
11 47. Dubow, E. F., Boxer, P. & Huesmann, L. R. (2009). Long-term effects of parents' education  
12 on children's educational and occupational success: Mediation by family interactions, child  
13 aggression, and teenage aspirations. *Merrill Palmer Q (Wayne State Univ Press)* 55:224–  
14 49.  
15  
16 48. Maurin, E. (2002). The impact of parental income on early schooling transitions: A re-  
17 examination using data over three generations. *J Public Econ.* 85:301–32.  
18  
19 49. Der, G., Batty, G. D. & Deary, I. J. (2006). Effect of breast feeding on intelligence in  
20 children: Prospective study, sibling pairs analysis, and meta-analysis. *BMJ.* 333:945.  
21  
22 50. Warsito, O., Khomsan, A., Hernawati, N. & Anwar, F. (2012). Relationship between  
23 nutritional status, psychosocial stimulation, and cognitive development in preschool  
24 children in Indonesia. *Nutr Res Pract.* 6:451–7.  
25  
26 51. More, S., Shivkumar, V. B., Gangane, N. & Shende, S. (2013). Effects of iron deficiency  
27 on cognitive function in school going adolescent females in rural area of central  
28 India. *Anemia.* 819136.  
29  
30  
31  
32  
33  
34  
35  
36

### 37 **List of figures:**

38  
39  
40 Figure 1: Distribution of participants based on gender and age group across ten study sites.  
41

42 Figure 2: Study sites and their geo-coordinates  
43  
44  
45  
46  
47  
48  
49  
50  
51  
52  
53  
54  
55  
56  
57  
58  
59  
60

1  
2  
3  
4  
5  
6  
7  
8  
9  
10  
11  
12  
13  
14  
15  
16  
17  
18  
19  
20  
21  
22  
23  
24  
25  
26  
27  
28  
29  
30  
31  
32  
33  
34  
35  
36  
37  
38  
39  
40  
41  
42  
43  
44  
45  
46  
47  
48  
49  
50  
51  
52  
53  
54  
55  
56  
57  
58  
59  
60

| Site               | Male<br>6 to 11 years | Female<br>6 to 11 years | Male<br>12 to 16 years | Female<br>12 to 16 years | Total       |
|--------------------|-----------------------|-------------------------|------------------------|--------------------------|-------------|
| Bangalore          | 60                    | 60                      | 60                     | 60                       | 240         |
| Bhubaneswar        | 60                    | 60                      | 60                     | 60                       | 240         |
| Chandigarh         | 60                    | 60                      | 60                     | 60                       | 240         |
| Dibrugarh          | 60                    | 60                      | 60                     | 60                       | 240         |
| Jodhpur            | 60                    | 60                      | 60                     | 60                       | 240         |
| Lucknow            | 60                    | 60                      | 60                     | 60                       | 240         |
| Manipal            | 60                    | 60                      | 60                     | 60                       | 240         |
| Patna              | 60                    | 60                      | 60                     | 60                       | 240         |
| Srinagar           | 60                    | 60                      | 60                     | 60                       | 240         |
| Thiruvananthapuram | 60                    | 60                      | 60                     | 60                       | 240         |
| <b>Total</b>       | <b>600</b>            | <b>600</b>              | <b>600</b>             | <b>600</b>               | <b>2400</b> |

Distribution of participants based on gender and age group across ten study sites.

324x182mm (96 x 96 DPI)



1  
2  
3  
4  
5  
6  
7  
8  
9  
10  
11  
12  
13  
14  
15  
16  
17  
18  
19  
20  
21  
22  
23  
24  
25  
26  
27  
28  
29  
30  
31  
32  
33  
34  
35  
36  
37  
38  
39  
40  
41  
42  
43  
44  
45  
46  
47  
48  
49  
50  
51  
52  
53  
54  
55  
56  
57  
58  
59  
60

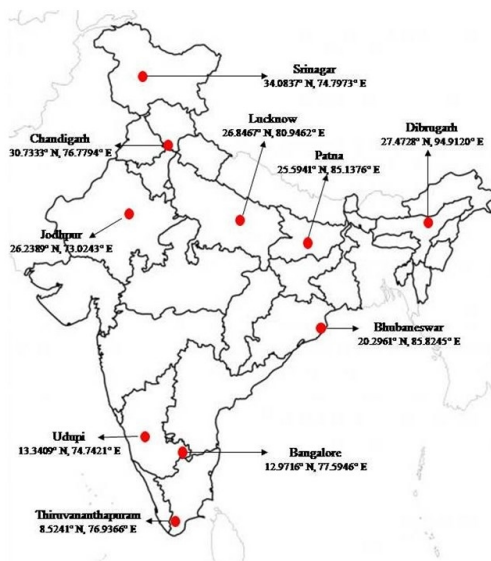

Study sites and their geo-coordinates

338x190mm (96 x 96 DPI)
